# Supplementary material for: Evolutionary prediction of medicinal properties in the genus Euphorbia L
Source: PubMed Central journal article supplement (PMC4964329; doi:10.1038/srep30531), 2016-07-28
Supplement: srep30531-s1.pdf [file srep30531-s1.pdf]

# Supplementary Information

## **Evolutionary prediction of medicinal properties in the genus *Euphorbia* L.**

Madeleine Ernst<sup>1</sup>, C. Haris Saslis-Lagoudakis<sup>1</sup>, Olwen M. Grace<sup>2</sup>, Niclas Nilsson<sup>3</sup>, Henrik Toft Simonsen<sup>4</sup>, James W. Horn<sup>5</sup>, Nina Rønsted<sup>1</sup>

<sup>1</sup> Natural History Museum of Denmark, Faculty of Science, University of Copenhagen, Sølvgade 83S, DK-1307 Copenhagen K, Denmark

<sup>2</sup> Comparative Plant & Fungal Biology, Royal Botanic Gardens, Kew, Surrey TW9 3AB, United Kingdom

<sup>3</sup> Skin Research, LEO Pharma A/S, Industriparken 55, DK-2750 Ballerup, Denmark

<sup>4</sup> Department of Systems Biology, Technical University of Denmark, DK-2800 Kgs. Lyngby, Denmark

<sup>5</sup> Natural and Applied Sciences, University of Wisconsin, Green Bay, LS 458, UW-Green Bay, 2420 Nicolet Dr, Green Bay, WI 54311-7001, USA

## Supplementary Methods

**Phylogenetic hypothesis.** Although previous studies have used various DNA markers, we found that the plastid marker *ndhF*, as well as the nuclear *ITS* were the ones that have been extensively sampled across subgenera. However, high divergence of *ITS* sequences within *Euphorbia* created a high level of alignment ambiguity at the genus level. Therefore, we based our phylogenetic analysis only on the *ndhF* sequence data. Sequences were aligned using MAFFT Version 7.205<sup>1</sup> with default parameters and subsequent manual adjustments were made in Mesquite Version 3.01<sup>2</sup>. Indels were in triplets apart from autapomorphic indels in certain sequences and in non-protein coding parts of the sequence. The nucleotide substitution model was determined in jModelTest version 2.1.7<sup>3,4</sup>. Using the Akaike Information Criterion<sup>5</sup> (AIC) GTR + I + G was selected as best model. Bayesian MCMC analyses<sup>6</sup> were performed using MrBayes version 3.2.5<sup>7</sup>. Two concurrent runs of 4 chains of  $1 \times 10^7$  generations were executed, sampling every 500 generations. Examination of the trace files in Tracer 1.6.0<sup>8</sup> demonstrated convergence of the runs and the average standard deviation of split frequencies in MrBayes reached a value below 0.007. Tracer was also used to ensure an effective sample size of  $> 200$  for all parameters. The plot of the log likelihood values in Tracer indicated a relative burn-in period of 10%. Therefore, the first 10% of the trees from each run were disregarded when computing the consensus tree in MrBayes.

**Medicinal uses of species of the genus *Euphorbia*.** In all phylogenetic manipulations, information below the species rank was not taken into account (all relevant information was merged at the species rank). Species in the phylogenetic tree with no record in the database<sup>9</sup> were scored as having no use (assigning 0 as the binary trait in the data matrix).

**Identifying *Euphorbia* uses modulating an inflammatory response.** A use record in our database<sup>9</sup> was allocated to the *inflammatory response* category if either present treatment methods could likely mediate an inflammatory response or if the symptom of the disease for which the plant species is used could be associated to an inflammatory response. Species were assigned to the *inflammatory response* category, when at least one of their described uses in the database<sup>9</sup> could be linked to an inflammatory response.

**Evolutionary patterns of medicinal properties in *Euphorbia*.** The D statistic is independent of tree size and trait prevalence (number of species in one category divided by the total number of species in the tree) if the tree has at least 50 terminals<sup>10</sup>. Our tree of 560 species therefore allowed the assumption of an unbiased estimate for D. However, cases of extremely low prevalence (e.g. 0.02 and under, or up to 8 species in a category in our study) have not been tested by Fritz and Purvis<sup>10</sup>. For our study, we considered categories with prevalence below 0.02 as potentially biased and therefore did not include them in any analysis. All comparative analyses were performed on phylograms with branch lengths proportional to DNA changes. Trees were only made ultrametric using the *chronopl* function in the R package *ape*<sup>11</sup> after statistical analyses for visualization purposes. Additional to the R packages mentioned in the main text also *geiger*<sup>12</sup> and *plyr*<sup>13</sup> were used. For graphical representation the tree drawing tool FigTree Version 1.4.2 (<http://tree.bio.ed.ac.uk/software/figtree/>) as well as the R environment extended by corresponding packages were used.

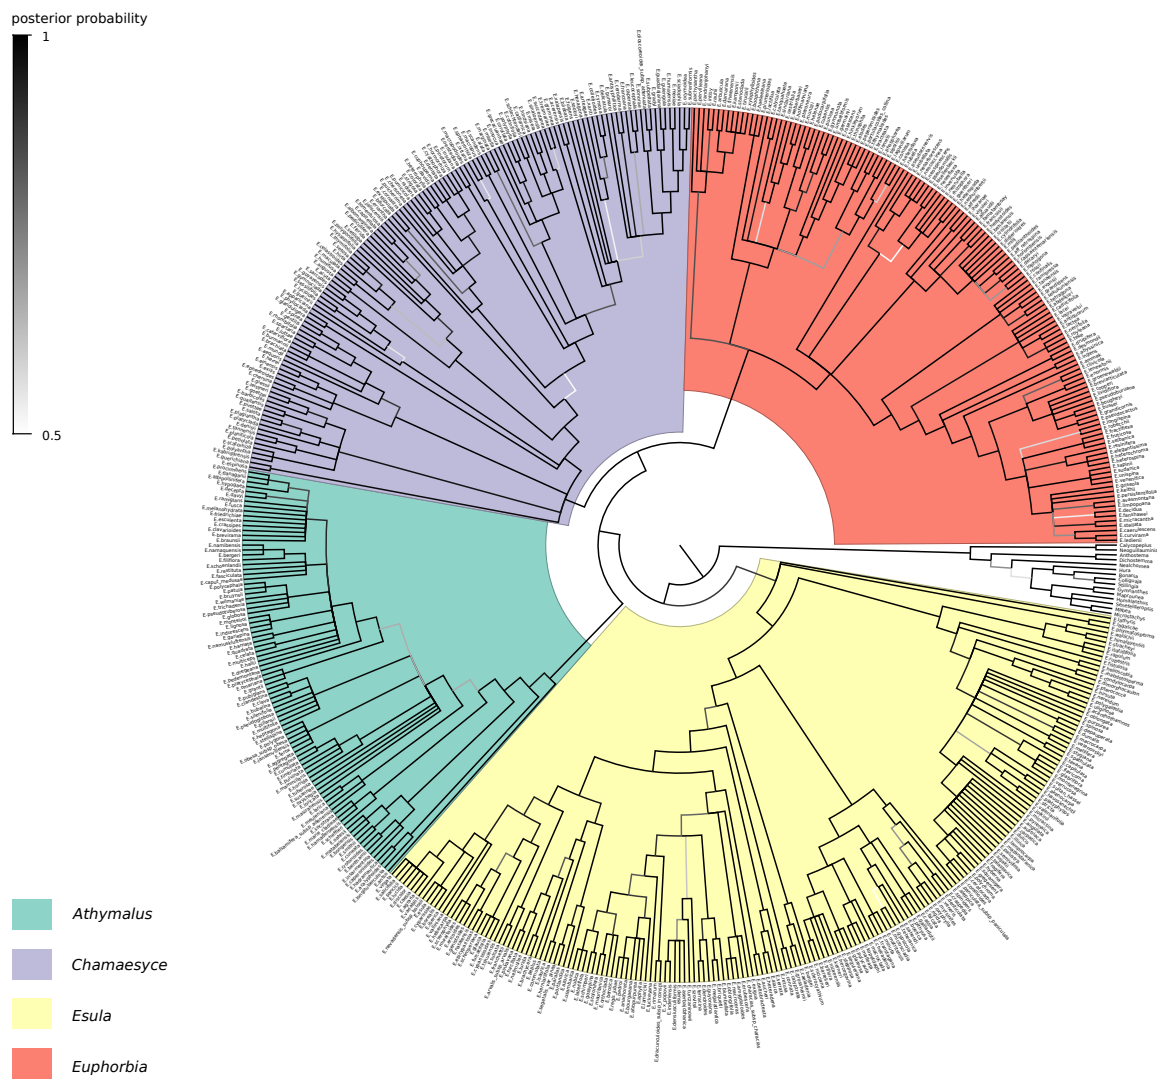

**Supplementary Figure 1. Bayesian majority consensus tree.** The tree is based on publicly available sequences of the marker *ndhF*. Branches are coloured according to the posterior probabilities.

**Supplementary Table 1. Species sampled per subgeneric clade.** Number of (medicinal) species sampled and corresponding estimated number of species per subgeneric clade, according to<sup>14–17</sup>.

| Clade             | Sampled          | Estimated       | Medicinal species |
|-------------------|------------------|-----------------|-------------------|
| <i>Athymalus</i>  | 91 (60%)         | 150             | 8                 |
| <i>Chamaesyce</i> | 127 (21%)        | 600             | 19                |
| <i>Esula</i>      | 190 (40%)        | 480             | 23                |
| <i>Euphorbia</i>  | 137 (21%)        | >650            | 15                |
| <b>Total</b>      | <b>560 (30%)</b> | <b>&gt;1880</b> | <b>65</b>         |

Supplementary Table 2. GenBank accession numbers. Names and GenBank accession numbers of species sampled.

| Genus            | Species                | Author                                              | GenBank  | Clade            |
|------------------|------------------------|-----------------------------------------------------|----------|------------------|
| <i>Euphorbia</i> | <i>acalyphoides</i>    | Hochst. ex Boiss.                                   | AF538251 | <i>Athymalus</i> |
| <i>Euphorbia</i> | <i>aggregata</i>       | A. Berger                                           | JN249097 | <i>Athymalus</i> |
| <i>Euphorbia</i> | <i>alpipollinifera</i> | L.C. Leach                                          | KF267330 | <i>Athymalus</i> |
| <i>Euphorbia</i> | <i>antso</i>           | Denis                                               | JN249102 | <i>Athymalus</i> |
| <i>Euphorbia</i> | <i>balsamifera</i>     |                                                     | KF267335 | <i>Athymalus</i> |
|                  |                        | subsp. <i>adenensis</i> (Deflers)<br>P. R. O. Bally |          |                  |
| <i>Euphorbia</i> | <i>benthamii</i>       | Hiern                                               | KF267336 | <i>Athymalus</i> |
| <i>Euphorbia</i> | <i>bergeri</i>         | N. E. Br.                                           | JN249109 | <i>Athymalus</i> |
| <i>Euphorbia</i> | <i>bongensis</i>       | Kotschy and Peyr. ex Boiss.                         | KC019860 | <i>Athymalus</i> |
| <i>Euphorbia</i> | <i>braunsii</i>        | N. E. Br.                                           | KF267341 | <i>Athymalus</i> |
| <i>Euphorbia</i> | <i>brevirama</i>       | N. E. Br.                                           | KF267342 | <i>Athymalus</i> |
| <i>Euphorbia</i> | <i>bruynsii</i>        | L.C. Leach                                          | KF267343 | <i>Athymalus</i> |
| <i>Euphorbia</i> | <i>bubalina</i>        | Boiss.                                              | JN249112 | <i>Athymalus</i> |
| <i>Euphorbia</i> | <i>caperonioides</i>   | R. A. Dyer and P. G. Mey.                           | KF267346 | <i>Athymalus</i> |
| <i>Euphorbia</i> | <i>caput-medusae</i>   | L.                                                  | KF267347 | <i>Athymalus</i> |
| <i>Euphorbia</i> | <i>celata</i>          | R. A. Dyer                                          | KF267350 | <i>Athymalus</i> |
| <i>Euphorbia</i> | <i>clandestina</i>     | Jacq.                                               | KF267351 | <i>Athymalus</i> |
| <i>Euphorbia</i> | <i>clava</i>           | Jacq.                                               | JN249117 | <i>Athymalus</i> |
| <i>Euphorbia</i> | <i>clavarioides</i>    | Boiss.                                              | KF267352 | <i>Athymalus</i> |
| <i>Euphorbia</i> | <i>crassipes</i>       | Marloth                                             | KF267355 | <i>Athymalus</i> |
| <i>Euphorbia</i> | <i>crotonoides</i>     | Boiss.                                              | JQ750784 | <i>Athymalus</i> |
| <i>Euphorbia</i> | <i>cumulata</i>        | R. A. Dyer                                          | KF267358 | <i>Athymalus</i> |
| <i>Euphorbia</i> | <i>cuneata</i>         | Vahl                                                | KF267359 | <i>Athymalus</i> |
| <i>Euphorbia</i> | <i>davyi</i>           | N. E. Br.                                           | KF267361 | <i>Athymalus</i> |
| <i>Euphorbia</i> | <i>decepta</i>         | N. E. Br.                                           | KF267365 | <i>Athymalus</i> |
| <i>Euphorbia</i> | <i>dregeana</i>        | E. Mey. ex Boiss.                                   | JN249130 | <i>Athymalus</i> |
| <i>Euphorbia</i> | <i>esculenta</i>       | Marloth                                             | KF267366 | <i>Athymalus</i> |
| <i>Euphorbia</i> | <i>fasciculata</i>     | Thunb.                                              | JN249137 | <i>Athymalus</i> |

Supplementary Table 2 continued. GenBank accession numbers. Names and GenBank accession numbers of species sampled.

| Genus            | Species                 | Author            | GenBank  | Clade            |
|------------------|-------------------------|-------------------|----------|------------------|
| <i>Euphorbia</i> | <i>ferox</i>            | Marloth           | KF267368 | <i>Athymalus</i> |
| <i>Euphorbia</i> | <i>filiflora</i>        | Marloth           | JN249139 | <i>Athymalus</i> |
| <i>Euphorbia</i> | <i>fimbriata</i>        | Scop.             | JN249140 | <i>Athymalus</i> |
| <i>Euphorbia</i> | <i>flanaganii</i>       | N. E. Br.         | JN249141 | <i>Athymalus</i> |
| <i>Euphorbia</i> | <i>friedrichiae</i>     | Dinter            | KF267373 | <i>Athymalus</i> |
| <i>Euphorbia</i> | <i>fusca</i>            | Marloth           | JN249145 | <i>Athymalus</i> |
| <i>Euphorbia</i> | <i>garipeina</i>        | Boiss.            | JN249146 | <i>Athymalus</i> |
| <i>Euphorbia</i> | <i>globosa</i>          | (Haw.) Sims       | JN249149 | <i>Athymalus</i> |
| <i>Euphorbia</i> | <i>grantii</i>          | Oliv.             | JN249153 | <i>Athymalus</i> |
| <i>Euphorbia</i> | <i>hadramautica</i>     | Baker             | KC019792 | <i>Athymalus</i> |
| <i>Euphorbia</i> | <i>hallii</i>           | R. A. Dyer        | KF267376 | <i>Athymalus</i> |
| <i>Euphorbia</i> | <i>hamaderoensis</i>    | A. G. Mill.       | KF267377 | <i>Athymalus</i> |
| <i>Euphorbia</i> | <i>hamata</i>           | (Haw.) Sweet      | AF538237 | <i>Athymalus</i> |
| <i>Euphorbia</i> | <i>heptagona</i>        | L.                | KF267378 | <i>Athymalus</i> |
| <i>Euphorbia</i> | <i>horrida</i>          | Boiss.            | JN249162 | <i>Athymalus</i> |
| <i>Euphorbia</i> | <i>hypogaea</i>         | Marloth           | KF267381 | <i>Athymalus</i> |
| <i>Euphorbia</i> | <i>indurescens</i>      | L. C. Leach       | KF267382 | <i>Athymalus</i> |
| <i>Euphorbia</i> | <i>insarmentosa</i>     | P. G. Mey.        | KF267383 | <i>Athymalus</i> |
| <i>Euphorbia</i> | <i>jansenvillensis</i>  | Nel               | JN249166 | <i>Athymalus</i> |
| <i>Euphorbia</i> | <i>larica</i>           | Boiss.            | KC212430 | <i>Athymalus</i> |
| <i>Euphorbia</i> | <i>lignosa</i>          | Marloth           | JN249173 | <i>Athymalus</i> |
| <i>Euphorbia</i> | <i>longituberculosa</i> | Hochst. ex Boiss. | AF538252 | <i>Athymalus</i> |
| <i>Euphorbia</i> | <i>loricata</i>         | Lam.              | KF267395 | <i>Athymalus</i> |
| <i>Euphorbia</i> | <i>mammillaris</i>      | L.                | KF267400 | <i>Athymalus</i> |
| <i>Euphorbia</i> | <i>marie-cladiae</i>    | Rzepecky          | KF267401 | <i>Athymalus</i> |
| <i>Euphorbia</i> | <i>masirahensis</i>     | Ghaz.             | KF267402 | <i>Athymalus</i> |
| <i>Euphorbia</i> | <i>matabelensis</i>     | Pax               | KF267403 | <i>Athymalus</i> |
| <i>Euphorbia</i> | <i>melanohydrata</i>    | Nel               | KF267404 | <i>Athymalus</i> |

Supplementary Table 2 continued. GenBank accession numbers. Names and GenBank accession numbers of species sampled.

| Genus            | Species                | Author        | GenBank  | Clade            |
|------------------|------------------------|---------------|----------|------------------|
| <i>Euphorbia</i> | <i>meuleniiana</i>     | O. Schwartz   | KF267405 | <i>Athymalus</i> |
| <i>Euphorbia</i> | <i>monteiroi</i>       | Hook.         | KF267406 | <i>Athymalus</i> |
| <i>Euphorbia</i> | <i>multiceps</i>       | A. Berger     | KF267408 | <i>Athymalus</i> |
| <i>Euphorbia</i> | <i>multifolia</i>      | A. C. White   | KF267409 | <i>Athymalus</i> |
| <i>Euphorbia</i> | <i>namaquensis</i>     | N. E. Br.     | KF267410 | <i>Athymalus</i> |
| <i>Euphorbia</i> | <i>namibensis</i>      | Marloth       | KF267411 | <i>Athymalus</i> |
| <i>Euphorbia</i> | <i>namuskluftensis</i> | L. C. Leach   | JN249182 | <i>Athymalus</i> |
| <i>Euphorbia</i> | <i>oatesii</i>         | Rolfe         | KF267412 | <i>Athymalus</i> |
| <i>Euphorbia</i> | <i>obesa</i>           |               | JN249189 | <i>Athymalus</i> |
| <i>Euphorbia</i> | <i>omariana</i>        | M. G. Gilbert | AF538243 | <i>Athymalus</i> |
| <i>Euphorbia</i> | <i>oxystegia</i>       | Boiss.        | KF267413 | <i>Athymalus</i> |
| <i>Euphorbia</i> | <i>patula</i>          | Mill.         | KF267414 | <i>Athymalus</i> |
| <i>Euphorbia</i> | <i>pedemontana</i>     | L. C. Leach   | JN249195 | <i>Athymalus</i> |
| <i>Euphorbia</i> | <i>pentagona</i>       | Haw.          | KF267415 | <i>Athymalus</i> |
| <i>Euphorbia</i> | <i>pillansii</i>       | N. E. Br.     | KF267416 | <i>Athymalus</i> |
| <i>Euphorbia</i> | <i>platycephala</i>    | Pax           | AF538241 | <i>Athymalus</i> |
| <i>Euphorbia</i> | <i>polycephala</i>     | Marloth       | JN249202 | <i>Athymalus</i> |
| <i>Euphorbia</i> | <i>polygona</i>        | Haw.          | KF267292 | <i>Athymalus</i> |
| <i>Euphorbia</i> | <i>procumbens</i>      | Mill.         | KF267420 | <i>Athymalus</i> |
| <i>Euphorbia</i> | <i>pseudoglobosa</i>   | Marloth       | JN249205 | <i>Athymalus</i> |
| <i>Euphorbia</i> | <i>pseudotuberosa</i>  | Pax           | KF267423 | <i>Athymalus</i> |
| <i>Euphorbia</i> | <i>pubiglans</i>       | N. E. Br.     | KF267424 | <i>Athymalus</i> |
| <i>Euphorbia</i> | <i>pulvinata</i>       | Marloth       | KF267426 | <i>Athymalus</i> |
| <i>Euphorbia</i> | <i>quadrata</i>        | Nel           | KF267427 | <i>Athymalus</i> |
| <i>Euphorbia</i> | <i>ramiglans</i>       | N. E. Br.     | JN249211 | <i>Athymalus</i> |
| <i>Euphorbia</i> | <i>restituta</i>       | N. E. Br.     | KF267428 | <i>Athymalus</i> |
| <i>Euphorbia</i> | <i>scheffleri</i>      | Pax           | JN249220 | <i>Athymalus</i> |
| <i>Euphorbia</i> | <i>schoenlandii</i>    | Pax           | JN249222 | <i>Athymalus</i> |

Supplementary Table 2 continued. GenBank accession numbers. Names and GenBank accession numbers of species sampled.

| Genus            | Species                | Author                                  | GenBank  | Clade             |
|------------------|------------------------|-----------------------------------------|----------|-------------------|
| <i>Euphorbia</i> | <i>silenifolia</i>     | (Haw.) Sweet                            | KF267430 | <i>Athymalus</i>  |
| <i>Euphorbia</i> | <i>smithii</i>         | S. Carter                               | JN249227 | <i>Athymalus</i>  |
| <i>Euphorbia</i> | <i>socotrana</i>       | Balf. f.                                | JN249228 | <i>Athymalus</i>  |
| <i>Euphorbia</i> | <i>stellispina</i>     | Haw.                                    | KF267431 | <i>Athymalus</i>  |
| <i>Euphorbia</i> | <i>susannae</i>        | Marloth                                 | KF267432 | <i>Athymalus</i>  |
| <i>Euphorbia</i> | <i>trichadenia</i>     | Pax                                     | AF538236 | <i>Athymalus</i>  |
| <i>Euphorbia</i> | <i>tuberosa</i>        | L.                                      | AF538246 | <i>Athymalus</i>  |
| <i>Euphorbia</i> | <i>wilmanica</i>       | Marloth                                 | KF267434 | <i>Athymalus</i>  |
| <i>Euphorbia</i> | <i>acerensis</i>       | Boiss.                                  | JQ750757 | <i>Chamaesyce</i> |
| <i>Euphorbia</i> | <i>acuta</i>           | Engelm.                                 | AF538176 | <i>Chamaesyce</i> |
| <i>Euphorbia</i> | <i>aequoris</i>        | N. E. Br.                               | JQ750759 | <i>Chamaesyce</i> |
| <i>Euphorbia</i> | <i>alata</i>           | Hook.                                   | JQ750760 | <i>Chamaesyce</i> |
| <i>Euphorbia</i> | <i>albomarginata</i>   | Torr. and A. Gray                       | JQ750762 | <i>Chamaesyce</i> |
| <i>Euphorbia</i> | <i>angusta</i>         | Engelm.                                 | JQ750763 | <i>Chamaesyce</i> |
| <i>Euphorbia</i> | <i>antisiphilitica</i> | Zucc.                                   | JQ750764 | <i>Chamaesyce</i> |
| <i>Euphorbia</i> | <i>appariciona</i>     | Rizzini                                 | JQ750765 | <i>Chamaesyce</i> |
| <i>Euphorbia</i> | <i>arteagae</i>        | W. R. Buck and Huft                     | JQ750766 | <i>Chamaesyce</i> |
| <i>Euphorbia</i> | <i>barbicollis</i>     | P. R. O. Bally                          | JQ750767 | <i>Chamaesyce</i> |
| <i>Euphorbia</i> | <i>bifurcata</i>       | Engelm.                                 | AF538173 | <i>Chamaesyce</i> |
| <i>Euphorbia</i> | <i>bilobata</i>        | Engelm.                                 | JQ750769 | <i>Chamaesyce</i> |
| <i>Euphorbia</i> | <i>brachiata</i>       | (E. Mey. ex Klotzsch and Garcke) Boiss. | JQ750770 | <i>Chamaesyce</i> |
| <i>Euphorbia</i> | <i>burmanni</i>        | (Klotzsch and Garcke) E. Mey. ex Boiss. | JQ750772 | <i>Chamaesyce</i> |
| <i>Euphorbia</i> | <i>californica</i>     | Benth.                                  | JQ750773 | <i>Chamaesyce</i> |
| <i>Euphorbia</i> | <i>caperata</i>        | McVaugh                                 | JQ750774 | <i>Chamaesyce</i> |
| <i>Euphorbia</i> | <i>capitellata</i>     | Engelm.                                 | JQ750775 | <i>Chamaesyce</i> |
| <i>Euphorbia</i> | <i>caterwiflora</i>    | N. E. Br.                               | JQ750776 | <i>Chamaesyce</i> |



Supplementary Table 2 continued. GenBank accession numbers. Names and GenBank accession numbers of species sampled.

| Genus                | Species              | Author                                           | GenBank  | Clade             |
|----------------------|----------------------|--------------------------------------------------|----------|-------------------|
| 110 <i>Euphorbia</i> | <i>celastroides</i>  | Boiss.                                           | JQ750777 | <i>Chamaesyce</i> |
| 111 <i>Euphorbia</i> | <i>ceroderma</i>     | I. M. Johnston.                                  | AF538153 | <i>Chamaesyce</i> |
| 112 <i>Euphorbia</i> | <i>chersina</i>      | N. E. Br.                                        | JQ750778 | <i>Chamaesyce</i> |
| 113 <i>Euphorbia</i> | <i>chersonesa</i>    | Huff                                             | AF538174 | <i>Chamaesyce</i> |
| 114 <i>Euphorbia</i> | <i>collettioides</i> | Benth.                                           | JQ750779 | <i>Chamaesyce</i> |
| 115 <i>Euphorbia</i> | <i>colorata</i>      | Engelm.                                          | JQ750780 | <i>Chamaesyce</i> |
| 116 <i>Euphorbia</i> | <i>cornastra</i>     | (Dressler) Radcl.-Sm.                            | JQ750781 | <i>Chamaesyce</i> |
| 117 <i>Euphorbia</i> | <i>corollata</i>     | L.                                               | JQ750782 | <i>Chamaesyce</i> |
| 118 <i>Euphorbia</i> | <i>cotinifolia</i>   | L.                                               | JQ750783 | <i>Chamaesyce</i> |
| 119 <i>Euphorbia</i> | <i>euphosperma</i>   | (Engelm.) Boiss.                                 | JQ750785 | <i>Chamaesyce</i> |
| 120 <i>Euphorbia</i> | <i>cyathophora</i>   | Murray                                           | JQ750786 | <i>Chamaesyce</i> |
| 121 <i>Euphorbia</i> | <i>cymosa</i>        | Poir.                                            | JQ750787 | <i>Chamaesyce</i> |
| 122 <i>Euphorbia</i> | <i>dauidii</i>       | Subils (as <i>E.dentata</i> in Horn et al. 2012) | JN249126 | <i>Chamaesyce</i> |
| 123 <i>Euphorbia</i> | <i>delicatula</i>    | Boiss.                                           | AF538152 | <i>Chamaesyce</i> |
| 124 <i>Euphorbia</i> | <i>denisii</i>       | Oudejans                                         | JQ750788 | <i>Chamaesyce</i> |
| 125 <i>Euphorbia</i> | <i>dentata</i>       | Michx.                                           | JQ750789 | <i>Chamaesyce</i> |
| 126 <i>Euphorbia</i> | <i>dioscoreoides</i> |                                                  | JQ750790 | <i>Chamaesyce</i> |
| 127 <i>Euphorbia</i> | <i>einensis</i>      | G. Will.                                         | JQ750791 | <i>Chamaesyce</i> |
| 128 <i>Euphorbia</i> | <i>ephedroides</i>   | E. Mey. ex Boiss.                                | JQ750792 | <i>Chamaesyce</i> |
| 129 <i>Euphorbia</i> | <i>eriantha</i>      | Benth.                                           | AF538167 | <i>Chamaesyce</i> |
| 130 <i>Euphorbia</i> | <i>espinosa</i>      | Pax                                              | AF538190 | <i>Chamaesyce</i> |
| 131 <i>Euphorbia</i> | <i>exilis</i>        | L. C. Leach                                      | JQ750798 | <i>Chamaesyce</i> |
| 132 <i>Euphorbia</i> | <i>exstipulata</i>   | Engelm.                                          | JQ750793 | <i>Chamaesyce</i> |
| 133 <i>Euphorbia</i> | <i>florida</i>       | Engelm.                                          | JQ750794 | <i>Chamaesyce</i> |
| 134 <i>Euphorbia</i> | <i>francoana</i>     | Boiss.                                           | JQ750795 | <i>Chamaesyce</i> |
| 135 <i>Euphorbia</i> | <i>fulgens</i>       | Karw. ex Klotzsch                                | AF538154 | <i>Chamaesyce</i> |

subsp. *attenuata* V. W. Steimm.

Supplementary Table 2 continued. GenBank accession numbers. Names and GenBank accession numbers of species sampled.

| Genus            | Species              | Author                                   | GenBank  | Clade             |
|------------------|----------------------|------------------------------------------|----------|-------------------|
| <i>Euphorbia</i> | <i>gentilis</i>      | N. E. Br.                                | JQ750796 | <i>Chamaesyce</i> |
| <i>Euphorbia</i> | <i>giessii</i>       | L. C. Leach                              | JQ750797 | <i>Chamaesyce</i> |
| <i>Euphorbia</i> | <i>glanduligera</i>  | Pax                                      | AF538178 | <i>Chamaesyce</i> |
| <i>Euphorbia</i> | <i>goetzei</i>       | Pax                                      | AF538185 | <i>Chamaesyce</i> |
| <i>Euphorbia</i> | <i>goyazensis</i>    | Boiss.                                   | JQ750799 | <i>Chamaesyce</i> |
| <i>Euphorbia</i> | <i>gradyi</i>        | V. W. Steimm. and Ram.-<br>Roa.          | AF538151 | <i>Chamaesyce</i> |
| <i>Euphorbia</i> | <i>graminea</i>      | Jacq.                                    | KF267329 | <i>Chamaesyce</i> |
| <i>Euphorbia</i> | <i>guadalajarana</i> | S. Watson                                | JQ750802 | <i>Chamaesyce</i> |
| <i>Euphorbia</i> | <i>queinzii</i>      | Boiss.                                   | JQ750803 | <i>Chamaesyce</i> |
| <i>Euphorbia</i> | <i>guerichiana</i>   | Pax                                      | JQ750804 | <i>Chamaesyce</i> |
| <i>Euphorbia</i> | <i>quiengola</i>     | W. R. Buck and Huft                      | JQ750805 | <i>Chamaesyce</i> |
| <i>Euphorbia</i> | <i>gumaroii</i>      | J. Meyran                                | JQ750806 | <i>Chamaesyce</i> |
| <i>Euphorbia</i> | <i>gymnoclada</i>    | Boiss.                                   | JQ750807 | <i>Chamaesyce</i> |
| <i>Euphorbia</i> | <i>herrei</i>        | A. C. White, R. A. Dyer and<br>B. Sloane | JQ750810 | <i>Chamaesyce</i> |
| <i>Euphorbia</i> | <i>heterophylla</i>  | L.                                       | JQ750811 | <i>Chamaesyce</i> |
| <i>Euphorbia</i> | <i>hexagona</i>      | Nutt. ex Spreng.                         | JQ750812 | <i>Chamaesyce</i> |
| <i>Euphorbia</i> | <i>hindsiana</i>     | Benth.                                   | JQ750813 | <i>Chamaesyce</i> |
| <i>Euphorbia</i> | <i>hirta</i>         | L.                                       | JQ750815 | <i>Chamaesyce</i> |
| <i>Euphorbia</i> | <i>hormorrhiza</i>   | Radcl.-Sm.                               | AF538165 | <i>Chamaesyce</i> |
| <i>Euphorbia</i> | <i>humayensis</i>    | Brandegee                                | JQ750816 | <i>Chamaesyce</i> |
| <i>Euphorbia</i> | <i>humifusa</i>      | Willd.                                   | JQ750817 | <i>Chamaesyce</i> |
| <i>Euphorbia</i> | <i>hyssopifolia</i>  | L.                                       | JQ750818 | <i>Chamaesyce</i> |
| <i>Euphorbia</i> | <i>innocua</i>       | L. C. Wheeler                            | AF538161 | <i>Chamaesyce</i> |
| <i>Euphorbia</i> | <i>insulana</i>      | Vell.                                    | JQ750819 | <i>Chamaesyce</i> |
| <i>Euphorbia</i> | <i>ipecacuanhae</i>  | L.                                       | JN249165 | <i>Chamaesyce</i> |
| <i>Euphorbia</i> | <i>ixtlana</i>       | Huft                                     | JQ750820 | <i>Chamaesyce</i> |

Supplementary Table 2 continued. GenBank accession numbers. Names and GenBank accession numbers of species sampled.

| Genus                | Species               | Author                           | GenBank  | Clade             |
|----------------------|-----------------------|----------------------------------|----------|-------------------|
| 162 <i>Euphorbia</i> | <i>jaliscensis</i>    | B. L. Rob. and Greenm.           | AF538166 | <i>Chamaesyce</i> |
| 163 <i>Euphorbia</i> | <i>juttae</i>         | Dinter                           | AF538188 | <i>Chamaesyce</i> |
| 164 <i>Euphorbia</i> | <i>kabridarensis</i>  | Thulin                           | JQ750822 | <i>Chamaesyce</i> |
| 165 <i>Euphorbia</i> | <i>leistneri</i>      | R. H. Archer                     | JQ750824 | <i>Chamaesyce</i> |
| 166 <i>Euphorbia</i> | <i>leucocephala</i>   | Lotsy                            | JN249172 | <i>Chamaesyce</i> |
| 167 <i>Euphorbia</i> | <i>lycioides</i>      | Boiss.                           | JQ750826 | <i>Chamaesyce</i> |
| 168 <i>Euphorbia</i> | <i>macropodooides</i> | B. L. Rob. and Greenm.           | JQ750827 | <i>Chamaesyce</i> |
| 169 <i>Euphorbia</i> | <i>macropus</i>       | (Klotzsch and Garcke)<br>Boiss.  | JQ750828 | <i>Chamaesyce</i> |
| 170 <i>Euphorbia</i> | <i>maculata</i>       | L.                               | JQ750829 | <i>Chamaesyce</i> |
| 171 <i>Euphorbia</i> | <i>marginata</i>      | Pursh                            | AJ534788 | <i>Chamaesyce</i> |
| 172 <i>Euphorbia</i> | <i>meriae</i>         | Standl.                          | JQ750831 | <i>Chamaesyce</i> |
| 173 <i>Euphorbia</i> | <i>misella</i>        | S. Watson                        | AF538160 | <i>Chamaesyce</i> |
| 174 <i>Euphorbia</i> | <i>misera</i>         | Benth.                           | JN249181 | <i>Chamaesyce</i> |
| 175 <i>Euphorbia</i> | <i>mundii</i>         | N. E. Br.                        | JQ750832 | <i>Chamaesyce</i> |
| 176 <i>Euphorbia</i> | <i>ocymoides</i>      | L.                               | JQ750833 | <i>Chamaesyce</i> |
| 177 <i>Euphorbia</i> | <i>oerstediana</i>    | (Klotzsch. and Garcke)<br>Boiss. | AF538159 | <i>Chamaesyce</i> |
| 178 <i>Euphorbia</i> | <i>pediculifera</i>   | Engelm.                          | JQ750834 | <i>Chamaesyce</i> |
| 179 <i>Euphorbia</i> | <i>petiolata</i>      | Banks and Sol.                   | AF538180 | <i>Chamaesyce</i> |
| 180 <i>Euphorbia</i> | <i>phylloclada</i>    | Boiss.                           | AF538179 | <i>Chamaesyce</i> |
| 181 <i>Euphorbia</i> | <i>pinetorum</i>      | (Small) G. L. Webster            | JQ750837 | <i>Chamaesyce</i> |
| 182 <i>Euphorbia</i> | <i>pirotae</i>        | N. Terrac.                       | AF538186 | <i>Chamaesyce</i> |
| 183 <i>Euphorbia</i> | <i>plagiantha</i>     | Drake                            | JQ750838 | <i>Chamaesyce</i> |
| 184 <i>Euphorbia</i> | <i>planiticola</i>    | D. C. Hassall                    | JQ750839 | <i>Chamaesyce</i> |
| 185 <i>Euphorbia</i> | <i>platyclada</i>     | Rauh                             | AF538187 | <i>Chamaesyce</i> |
| 186 <i>Euphorbia</i> | <i>polyantha</i>      | Pax                              | EU022107 | <i>Chamaesyce</i> |
| 187 <i>Euphorbia</i> | <i>polygonifolia</i>  | L.                               | JQ750840 | <i>Chamaesyce</i> |

Supplementary Table 2 continued. GenBank accession numbers. Names and GenBank accession numbers of species sampled.

| Genus            | Species                | Author              | GenBank  | Clade             |
|------------------|------------------------|---------------------|----------|-------------------|
| <i>Euphorbia</i> | <i>polyphylla</i>      | Engelm. ex Holz.    | JQ750841 | <i>Chamaesyce</i> |
| <i>Euphorbia</i> | <i>pulcherrima</i>     | Willd. ex Klotzsch  | JN249207 | <i>Chamaesyce</i> |
| <i>Euphorbia</i> | <i>pumicicola</i>      | Huft                | AF538164 | <i>Chamaesyce</i> |
| <i>Euphorbia</i> | <i>quaitensis</i>      | S. Carter           | EU022061 | <i>Chamaesyce</i> |
| <i>Euphorbia</i> | <i>radians</i>         | Benth.              | AF538169 | <i>Chamaesyce</i> |
| <i>Euphorbia</i> | <i>rhombofolia</i>     | Boiss.              | JQ750843 | <i>Chamaesyce</i> |
| <i>Euphorbia</i> | <i>salota</i>          | Leandri             | JQ750846 | <i>Chamaesyce</i> |
| <i>Euphorbia</i> | <i>sarcodes</i>        | Boiss.              | JQ750847 | <i>Chamaesyce</i> |
| <i>Euphorbia</i> | <i>scandens</i>        | Kunth               | JQ750848 | <i>Chamaesyce</i> |
| <i>Euphorbia</i> | <i>scatorhiza</i>      | S. Carter           | AF538181 | <i>Chamaesyce</i> |
| <i>Euphorbia</i> | <i>schlechtendalii</i> | Boiss.              | JQ750849 | <i>Chamaesyce</i> |
| <i>Euphorbia</i> | <i>sciadophila</i>     | Boiss.              | JQ750850 | <i>Chamaesyce</i> |
| <i>Euphorbia</i> | <i>sessilifolia</i>    | Klotzsch ex Boiss.  | JQ750851 | <i>Chamaesyce</i> |
| <i>Euphorbia</i> | <i>setiloba</i>        | Engelm. ex Torr.    | JQ750852 | <i>Chamaesyce</i> |
| <i>Euphorbia</i> | <i>setosa</i>          | (Boiss.) Mull. Arg. | JQ750853 | <i>Chamaesyce</i> |
| <i>Euphorbia</i> | <i>sinaloensis</i>     | Brandegee           | AF538156 | <i>Chamaesyce</i> |
| <i>Euphorbia</i> | <i>sonorae</i>         | Rose                | JQ750854 | <i>Chamaesyce</i> |
| <i>Euphorbia</i> | <i>soobyi</i>          | McVaugh             | JQ750855 | <i>Chamaesyce</i> |
| <i>Euphorbia</i> | <i>spartaria</i>       | N. E. Br.           | JQ750859 | <i>Chamaesyce</i> |
| <i>Euphorbia</i> | <i>sphaerorrhiza</i>   | Benth.              | JQ750860 | <i>Chamaesyce</i> |
| <i>Euphorbia</i> | <i>spinea</i>          | N. E. Br.           | JQ750862 | <i>Chamaesyce</i> |
| <i>Euphorbia</i> | <i>strigosa</i>        | Hook. and Arn.      | AF538163 | <i>Chamaesyce</i> |
| <i>Euphorbia</i> | <i>subpeltata</i>      | S. Watson           | JQ750863 | <i>Chamaesyce</i> |
| <i>Euphorbia</i> | <i>subreniformis</i>   | S. Watson           | JQ750864 | <i>Chamaesyce</i> |
| <i>Euphorbia</i> | <i>succedanea</i>      | L. C. Wheeler       | AF538162 | <i>Chamaesyce</i> |
| <i>Euphorbia</i> | <i>tannensis</i>       | Spreng.             | AF538184 | <i>Chamaesyce</i> |
| <i>Euphorbia</i> | <i>thymifolia</i>      | L.                  | JQ750865 | <i>Chamaesyce</i> |
| <i>Euphorbia</i> | <i>tomentulosa</i>     | S. Watson           | JN249236 | <i>Chamaesyce</i> |

Supplementary Table 2 continued. GenBank accession numbers. Names and GenBank accession numbers of species sampled.

| Genus            | Species                | Author                                  | GenBank  | Clade             |
|------------------|------------------------|-----------------------------------------|----------|-------------------|
| <i>Euphorbia</i> | <i>tresmariae</i>      | (Millsp.) Standl.                       | JQ750866 | <i>Chamaesyce</i> |
| <i>Euphorbia</i> | <i>xalapensis</i>      | Kunth                                   | JQ750867 | <i>Chamaesyce</i> |
| <i>Euphorbia</i> | <i>xanti</i>           | Engelm. ex Boiss.                       | JQ750868 | <i>Chamaesyce</i> |
| <i>Euphorbia</i> | <i>acanthothamnus</i>  | Heldr. and Sart. ex Boiss.              | JQ750756 | <i>Esula</i>      |
| <i>Euphorbia</i> | <i>agraria</i>         | M. Bieb.                                | KC212433 | <i>Esula</i>      |
| <i>Euphorbia</i> | <i>akenocarpa</i>      | Guss.                                   | JN249098 | <i>Esula</i>      |
| <i>Euphorbia</i> | <i>alaica</i>          | (Porkh.) Porkh.                         | KC212436 | <i>Esula</i>      |
| <i>Euphorbia</i> | <i>aleppica</i>        | L.                                      | KC212437 | <i>Esula</i>      |
| <i>Euphorbia</i> | <i>amygdaloides</i>    | L.                                      | KC212439 | <i>Esula</i>      |
| <i>Euphorbia</i> | <i>anachoreta</i>      | Svent.                                  | KC212440 | <i>Esula</i>      |
| <i>Euphorbia</i> | <i>angulata</i>        | Jacq.                                   | KC212175 | <i>Esula</i>      |
| <i>Euphorbia</i> | <i>aphylla</i>         | Brouss. ex Willd.                       | AF538225 | <i>Esula</i>      |
| <i>Euphorbia</i> | <i>arvalis</i>         | subsp. <i>arvalis</i> Boiss. and Heldr. | KC212442 | <i>Esula</i>      |
| <i>Euphorbia</i> | <i>aserbajdzhanica</i> | Bordz.                                  | KC212444 | <i>Esula</i>      |
| <i>Euphorbia</i> | <i>atropurpurea</i>    | Brouss. ex Willd.                       | KC212445 | <i>Esula</i>      |
| <i>Euphorbia</i> | <i>aucheri</i>         | Boiss.                                  | KC212446 | <i>Esula</i>      |
| <i>Euphorbia</i> | <i>austriaca</i>       | A. Kern.                                | KC212447 | <i>Esula</i>      |
| <i>Euphorbia</i> | <i>azorica</i>         | Hochst.                                 | KC212448 | <i>Esula</i>      |
| <i>Euphorbia</i> | <i>barrelieri</i>      | Savi                                    | KC212449 | <i>Esula</i>      |
| <i>Euphorbia</i> | <i>berotica</i>        | N. E. Br.                               | KC212451 | <i>Esula</i>      |
| <i>Euphorbia</i> | <i>biumbellata</i>     | Poir.                                   | KC212452 | <i>Esula</i>      |
| <i>Euphorbia</i> | <i>boetica</i>         | Boiss.                                  | KC212453 | <i>Esula</i>      |
| <i>Euphorbia</i> | <i>borealis</i>        | Baikov                                  | KC212455 | <i>Esula</i>      |
| <i>Euphorbia</i> | <i>bourgeana</i>       | J. Gay ex Boiss.                        | KC212456 | <i>Esula</i>      |
| <i>Euphorbia</i> | <i>brachycera</i>      | Engelm.                                 | KC212458 | <i>Esula</i>      |
| <i>Euphorbia</i> | <i>briquetii</i>       | Emb. and Maire                          | KC212459 | <i>Esula</i>      |
| <i>Euphorbia</i> | <i>bungei</i>          | Boiss.                                  | KC212460 | <i>Esula</i>      |

Supplementary Table 2 continued. GenBank accession numbers. Names and GenBank accession numbers of species sampled.

| Genus            | Species                  | Author                                    | GenBank  | Clade        |
|------------------|--------------------------|-------------------------------------------|----------|--------------|
| <i>Euphorbia</i> | <i>caeladenia</i>        | Boiss.                                    | KC212461 | <i>Esula</i> |
| <i>Euphorbia</i> | <i>caesia</i>            | Kar. and Kir.                             | KC212462 | <i>Esula</i> |
| <i>Euphorbia</i> | <i>calyptrata</i>        | Coss. and Durieu                          | JN249113 | <i>Esula</i> |
| <i>Euphorbia</i> | <i>capitulata</i>        | Rchb.                                     | KC212465 | <i>Esula</i> |
| <i>Euphorbia</i> | <i>carpatica</i>         | Wol.                                      | KC212466 | <i>Esula</i> |
| <i>Euphorbia</i> | <i>cassia</i>            | Boiss.                                    | KC212467 | <i>Esula</i> |
| <i>Euphorbia</i> | <i>ceratocarpa</i>       | Ten.                                      | KC212468 | <i>Esula</i> |
| <i>Euphorbia</i> | <i>characias</i>         |                                           | KC212469 | <i>Esula</i> |
| <i>Euphorbia</i> | <i>cheiradenia</i>       | Boiss. and Hohen.                         | KC212471 | <i>Esula</i> |
| <i>Euphorbia</i> | <i>commutata</i>         | Engelm. ex A. Gray                        | KC212472 | <i>Esula</i> |
| <i>Euphorbia</i> | <i>condylocarpa</i>      | M. Bieb.                                  | KC212473 | <i>Esula</i> |
| <i>Euphorbia</i> | <i>connata</i>           | Boiss.                                    | KC212475 | <i>Esula</i> |
| <i>Euphorbia</i> | <i>corallioides</i>      | L.                                        | KC212476 | <i>Esula</i> |
| <i>Euphorbia</i> | <i>craspedia</i>         | Boiss.                                    | KC212477 | <i>Esula</i> |
| <i>Euphorbia</i> | <i>cyparissias</i>       | L.                                        | KC212480 | <i>Esula</i> |
| <i>Euphorbia</i> | <i>cyparissiioides</i>   | Pax                                       | KC212481 | <i>Esula</i> |
| <i>Euphorbia</i> | <i>deltobracteata</i>    | (Porkh.) Porkh.                           | KC212482 | <i>Esula</i> |
| <i>Euphorbia</i> | <i>dendroides</i>        | L.                                        | JN249125 | <i>Esula</i> |
| <i>Euphorbia</i> | <i>densa</i>             | Schrenk                                   | KC212484 | <i>Esula</i> |
| <i>Euphorbia</i> | <i>densiusculiformis</i> | (Pazij) Botsch.                           | KC212487 | <i>Esula</i> |
| <i>Euphorbia</i> | <i>denticulata</i>       | Lam.                                      | KC212488 | <i>Esula</i> |
| <i>Euphorbia</i> | <i>depauperata</i>       | Hochst. ex A. Rich.                       | KC212489 | <i>Esula</i> |
| <i>Euphorbia</i> | <i>dimorphocaulon</i>    | P. H. Davis                               | JN249127 | <i>Esula</i> |
| <i>Euphorbia</i> | <i>discolor</i>          | Ledeb.                                    | KC212493 | <i>Esula</i> |
| <i>Euphorbia</i> | <i>dracunculoides</i>    |                                           | KC212494 | <i>Esula</i> |
|                  |                          | subsp. <i>inconspicua</i> (Ball)<br>Maire |          |              |
| <i>Euphorbia</i> | <i>dulcis</i>            | L.                                        | KC212495 | <i>Esula</i> |
| <i>Euphorbia</i> | <i>dumalis</i>           | S. Carter                                 | KC212497 | <i>Esula</i> |

Supplementary Table 2 continued. GenBank accession numbers. Names and GenBank accession numbers of species sampled.

| Genus                | Species               | Author                                 | GenBank  | Clade        |
|----------------------|-----------------------|----------------------------------------|----------|--------------|
| 270 <i>Euphorbia</i> | <i>epicyparissias</i> | (E. Mey. ex Klotzsch and Garke) Boiss. | KC212500 | <i>Esula</i> |
| 271 <i>Euphorbia</i> | <i>ericoides</i>      | Lam.                                   | JN249134 | <i>Esula</i> |
| 272 <i>Euphorbia</i> | <i>erubescens</i>     | Boiss.                                 | KC212501 | <i>Esula</i> |
| 273 <i>Euphorbia</i> | <i>esula</i>          | L.                                     | KC212502 | <i>Esula</i> |
| 274 <i>Euphorbia</i> | <i>exigua</i>         | L.                                     | KC212506 | <i>Esula</i> |
| 275 <i>Euphorbia</i> | <i>falcata</i>        | L.                                     | KC212507 | <i>Esula</i> |
| 276 <i>Euphorbia</i> | <i>fistulosa</i>      | M. S. Khan                             | KC212509 | <i>Esula</i> |
| 277 <i>Euphorbia</i> | <i>flavicomma</i>     | DC.                                    | JN249142 | <i>Esula</i> |
| 278 <i>Euphorbia</i> | <i>fragifera</i>      | Jan                                    | KC212514 | <i>Esula</i> |
| 279 <i>Euphorbia</i> | <i>franchetii</i>     | B. Fedtsch.                            | KC212516 | <i>Esula</i> |
| 280 <i>Euphorbia</i> | <i>furcatifolia</i>   | M. G. Gilbert                          | KC212517 | <i>Esula</i> |
| 281 <i>Euphorbia</i> | <i>furcillata</i>     | Kunth                                  | KC212518 | <i>Esula</i> |
| 282 <i>Euphorbia</i> | <i>gaillardotii</i>   | Boiss. and Blanche                     | KC212519 | <i>Esula</i> |
| 283 <i>Euphorbia</i> | <i>genistoides</i>    | P. J. Bergius                          | KC212520 | <i>Esula</i> |
| 284 <i>Euphorbia</i> | <i>glabriflora</i>    | Vis.                                   | KC212521 | <i>Esula</i> |
| 285 <i>Euphorbia</i> | <i>glareosa</i>       | Pall. ex M. Bieb.                      | KC212522 | <i>Esula</i> |
| 286 <i>Euphorbia</i> | <i>glauca</i>         | G. Forst.                              | KC212523 | <i>Esula</i> |
| 287 <i>Euphorbia</i> | <i>gossypina</i>      | Pax                                    | KC212525 | <i>Esula</i> |
| 288 <i>Euphorbia</i> | <i>gregersenii</i>    | K. Maly ex Beck                        | KC212528 | <i>Esula</i> |
| 289 <i>Euphorbia</i> | <i>grossheimii</i>    | (Porkh.) Porkh.                        | KC212529 | <i>Esula</i> |
| 290 <i>Euphorbia</i> | <i>guyoniana</i>      | Boiss. and Reut.                       | JN249155 | <i>Esula</i> |
| 291 <i>Euphorbia</i> | <i>gypsicola</i>      | Rech.f. and Aellen                     | KC212530 | <i>Esula</i> |
| 292 <i>Euphorbia</i> | <i>hausknechtii</i>   | Boiss.                                 | KC212531 | <i>Esula</i> |
| 293 <i>Euphorbia</i> | <i>hebecarpa</i>      | Boiss.                                 | KC212532 | <i>Esula</i> |
| 294 <i>Euphorbia</i> | <i>helioscopia</i>    | L.                                     | KC212533 | <i>Esula</i> |
| 295 <i>Euphorbia</i> | <i>hercegovina</i>    | Beck                                   | KC212535 | <i>Esula</i> |
| 296 <i>Euphorbia</i> | <i>herniariifolia</i> | Willd.                                 | KC212536 | <i>Esula</i> |

Supplementary Table 2 continued. GenBank accession numbers. Names and GenBank accession numbers of species sampled.

| Genus            | Species               | Author                 | GenBank  | Clade        |
|------------------|-----------------------|------------------------|----------|--------------|
| <i>Euphorbia</i> | <i>heteradena</i>     | Jaub. and Spach        | KC212537 | <i>Esula</i> |
| <i>Euphorbia</i> | <i>himalayensis</i>   | (Klotzsch) Boiss.      | KC212648 | <i>Esula</i> |
| <i>Euphorbia</i> | <i>hirsuta</i>        | L.                     | JN249161 | <i>Esula</i> |
| <i>Euphorbia</i> | <i>hyberna</i>        | L.                     | KC212538 | <i>Esula</i> |
| <i>Euphorbia</i> | <i>iberica</i>        | Boiss.                 | KC212540 | <i>Esula</i> |
| <i>Euphorbia</i> | <i>illirica</i>       | Lam.                   | KC212542 | <i>Esula</i> |
| <i>Euphorbia</i> | <i>indensis</i>       | Less. ex Kar. and Kir. | KC212544 | <i>Esula</i> |
| <i>Euphorbia</i> | <i>isatidifolia</i>   | Lam.                   | KC212545 | <i>Esula</i> |
| <i>Euphorbia</i> | <i>isaurica</i>       | M. S. Khan             | KC212547 | <i>Esula</i> |
| <i>Euphorbia</i> | <i>jolkinii</i>       | Boiss.                 | KC212548 | <i>Esula</i> |
| <i>Euphorbia</i> | <i>keneri</i>         | Huter ex A. Kern.      | KC212549 | <i>Esula</i> |
| <i>Euphorbia</i> | <i>kopetdaghi</i>     | (Porkh.) Porkh.        | KC212550 | <i>Esula</i> |
| <i>Euphorbia</i> | <i>lagascae</i>       | Spreng.                | KC212551 | <i>Esula</i> |
| <i>Euphorbia</i> | <i>lamarckii</i>      | Sweet                  | KC212553 | <i>Esula</i> |
| <i>Euphorbia</i> | <i>lamprocarpa</i>    | (Porkh.) Porkh.        | KC212554 | <i>Esula</i> |
| <i>Euphorbia</i> | <i>lateriflora</i>    | Schumach.              | JN249169 | <i>Esula</i> |
| <i>Euphorbia</i> | <i>lathyris</i>       | L.                     | JN249170 | <i>Esula</i> |
| <i>Euphorbia</i> | <i>lucida</i>         | Waldst. and Kit.       | KC212557 | <i>Esula</i> |
| <i>Euphorbia</i> | <i>lurida</i>         | Engelm.                | JN249176 | <i>Esula</i> |
| <i>Euphorbia</i> | <i>macrocarpa</i>     | Boiss. and Buhse       | KC212558 | <i>Esula</i> |
| <i>Euphorbia</i> | <i>macroceras</i>     | Fisch. and C. A. Mey.  | KC212560 | <i>Esula</i> |
| <i>Euphorbia</i> | <i>macroclada</i>     | Boiss.                 | KC212562 | <i>Esula</i> |
| <i>Euphorbia</i> | <i>malleata</i>       | Boiss.                 | KC212563 | <i>Esula</i> |
| <i>Euphorbia</i> | <i>matritensis</i>    | Boiss.                 | KC212564 | <i>Esula</i> |
| <i>Euphorbia</i> | <i>mauritanica</i>    | L.                     | JN249179 | <i>Esula</i> |
| <i>Euphorbia</i> | <i>mazandarunica</i>  | Pahlevani              | KC212567 | <i>Esula</i> |
| <i>Euphorbia</i> | <i>megalatlantica</i> | Ball                   | KC212569 | <i>Esula</i> |
| <i>Euphorbia</i> | <i>mellifera</i>      | Aiton                  | KC212570 | <i>Esula</i> |



Supplementary Table 2 continued. GenBank accession numbers. Names and GenBank accession numbers of species sampled.

| Genus            | Species              | Author                                     | GenBank  | Clade        |
|------------------|----------------------|--------------------------------------------|----------|--------------|
| <i>Euphorbia</i> | <i>micractina</i>    | Boiss.                                     | KC212571 | <i>Esula</i> |
| <i>Euphorbia</i> | <i>microsciadia</i>  | Boiss.                                     | KC212572 | <i>Esula</i> |
| <i>Euphorbia</i> | <i>minuta</i>        | Loscos and J. Pardo                        | KC212573 | <i>Esula</i> |
| <i>Euphorbia</i> | <i>montenegrina</i>  | (Bald.) K. Maly                            | KC212574 | <i>Esula</i> |
| <i>Euphorbia</i> | <i>muraltioides</i>  | N. E. Br.                                  | KC212575 | <i>Esula</i> |
| <i>Euphorbia</i> | <i>myrsinites</i>    | L.                                         | KC212576 | <i>Esula</i> |
| <i>Euphorbia</i> | <i>natalensis</i>    | Bernh. ex Krauss                           | KC212577 | <i>Esula</i> |
| <i>Euphorbia</i> | <i>neilmulleri</i>   | M. C. Johnst.                              | KC212578 | <i>Esula</i> |
| <i>Euphorbia</i> | <i>nercidum</i>      | Jahand. and Maire                          | JN249186 | <i>Esula</i> |
| <i>Euphorbia</i> | <i>nevadensis</i>    |                                            | KC212580 | <i>Esula</i> |
|                  |                      | subsp. <i>bolosii</i> Molero and<br>Rovira |          |              |
| <i>Euphorbia</i> | <i>nicacensis</i>    | All.                                       | JN249188 | <i>Esula</i> |
| <i>Euphorbia</i> | <i>niciciana</i>     | Borbas ex Novak                            | KC212584 | <i>Esula</i> |
| <i>Euphorbia</i> | <i>nubica</i>        | N. E. Br.                                  | KC212586 | <i>Esula</i> |
| <i>Euphorbia</i> | <i>oblongata</i>     | Griseb.                                    | KC212587 | <i>Esula</i> |
| <i>Euphorbia</i> | <i>oblongifolia</i>  | (K. Koch) K. Koch                          | KC212588 | <i>Esula</i> |
| <i>Euphorbia</i> | <i>orthoclada</i>    | Baker                                      | JN249191 | <i>Esula</i> |
| <i>Euphorbia</i> | <i>oxyphylla</i>     | Boiss.                                     | JN249192 | <i>Esula</i> |
| <i>Euphorbia</i> | <i>palustris</i>     | L.                                         | KC212591 | <i>Esula</i> |
| <i>Euphorbia</i> | <i>panicii</i>       | Beck                                       | KC212592 | <i>Esula</i> |
| <i>Euphorbia</i> | <i>paniculata</i>    |                                            | KC212594 | <i>Esula</i> |
| <i>Euphorbia</i> | <i>paralias</i>      | L.                                         | JN249194 | <i>Esula</i> |
| <i>Euphorbia</i> | <i>pedroi</i>        | Molero and Rovira                          | KC212596 | <i>Esula</i> |
| <i>Euphorbia</i> | <i>peplus</i>        | L.                                         | JN249197 | <i>Esula</i> |
| <i>Euphorbia</i> | <i>phymatosperma</i> | Boiss. and Gaill.                          | KC212599 | <i>Esula</i> |
| <i>Euphorbia</i> | <i>pinkavana</i>     | M. C. Johnst.                              | KC212601 | <i>Esula</i> |
| <i>Euphorbia</i> | <i>pithyusa</i>      | L.                                         | KC212602 | <i>Esula</i> |
| <i>Euphorbia</i> | <i>platyphyllos</i>  | L.                                         | KC212603 | <i>Esula</i> |
|                  |                      | subsp. <i>paniculata</i> Desf.             |          |              |

Supplementary Table 2 continued. GenBank accession numbers. Names and GenBank accession numbers of species sampled.

| Genus            | Species               | Author             | GenBank  | Clade        |
|------------------|-----------------------|--------------------|----------|--------------|
| <i>Euphorbia</i> | <i>polycaula</i>      | Boiss. and Hohen.  | KC212604 | <i>Esula</i> |
| <i>Euphorbia</i> | <i>polychroma</i>     | A. Kern.           | KC212605 | <i>Esula</i> |
| <i>Euphorbia</i> | <i>polygalifolia</i>  | Boiss. and Reut.   | KC212606 | <i>Esula</i> |
| <i>Euphorbia</i> | <i>portlandica</i>    | L.                 | KC212609 | <i>Esula</i> |
| <i>Euphorbia</i> | <i>pterococca</i>     | Brot.              | KC212611 | <i>Esula</i> |
| <i>Euphorbia</i> | <i>purpurea</i>       | (Raf.) Fernald     | KC212613 | <i>Esula</i> |
| <i>Euphorbia</i> | <i>pyrenaica</i>      | Jord.              | KC212614 | <i>Esula</i> |
| <i>Euphorbia</i> | <i>rapulum</i>        | Kar. and Kir.      | KC212616 | <i>Esula</i> |
| <i>Euphorbia</i> | <i>regis-jubae</i>    | Webb and Berthel.  | JN249213 | <i>Esula</i> |
| <i>Euphorbia</i> | <i>retusa</i>         | Forsk.             | JN249213 | <i>Esula</i> |
| <i>Euphorbia</i> | <i>rhabdotosperma</i> | Radcl.-Sm.         | KC212618 | <i>Esula</i> |
| <i>Euphorbia</i> | <i>rigida</i>         | M. Bieb.           | KC212619 | <i>Esula</i> |
| <i>Euphorbia</i> | <i>rimarum</i>        | Coss. and Balansa  | JN249217 | <i>Esula</i> |
| <i>Euphorbia</i> | <i>rupestris</i>      | Ledeb.             | KC212620 | <i>Esula</i> |
| <i>Euphorbia</i> | <i>sahendi</i>        | Bornm.             | KC212621 | <i>Esula</i> |
| <i>Euphorbia</i> | <i>salicifolia</i>    | Host               | KC212623 | <i>Esula</i> |
| <i>Euphorbia</i> | <i>schimperii</i>     | C. Presl           | KC212624 | <i>Esula</i> |
| <i>Euphorbia</i> | <i>schimperiana</i>   | Scheele            | KC212629 | <i>Esula</i> |
| <i>Euphorbia</i> | <i>sclerocyathium</i> | Korovin and Popov  | JN249224 | <i>Esula</i> |
| <i>Euphorbia</i> | <i>sclerophylla</i>   | Boiss.             | KC212630 | <i>Esula</i> |
| <i>Euphorbia</i> | <i>segetalis</i>      |                    | KC212600 | <i>Esula</i> |
| <i>Euphorbia</i> | <i>seguieriana</i>    | Neck.              | KC212631 | <i>Esula</i> |
| <i>Euphorbia</i> | <i>seminillosa</i>    | (Porkh.) Krylov    | KC212632 | <i>Esula</i> |
| <i>Euphorbia</i> | <i>serrata</i>        | L.                 | KC212633 | <i>Esula</i> |
| <i>Euphorbia</i> | <i>sojakii</i>        | (Chrtek and Krisa) | KC212634 | <i>Esula</i> |
| <i>Euphorbia</i> | <i>spathulata</i>     | Dubovik            |          |              |
| <i>Euphorbia</i> | <i>spinidens</i>      | Lam.               | JN249229 | <i>Esula</i> |
| <i>Euphorbia</i> |                       | Bornm. ex Porkh.   | KC212638 | <i>Esula</i> |

Supplementary Table 2 continued. GenBank accession numbers. Names and GenBank accession numbers of species sampled.

| Genus            | Species               | Author                    | GenBank  | Clade        |
|------------------|-----------------------|---------------------------|----------|--------------|
| <i>Euphorbia</i> | <i>spinosa</i>        | L.                        | KC212641 | <i>Esula</i> |
| <i>Euphorbia</i> | <i>squamigera</i>     | Loisel.                   | KC212642 | <i>Esula</i> |
| <i>Euphorbia</i> | <i>stepposa</i>       | Zoz                       | KC212643 | <i>Esula</i> |
| <i>Euphorbia</i> | <i>stolonifera</i>    | Marloth ex A. C. White    | KC212644 | <i>Esula</i> |
| <i>Euphorbia</i> | <i>stracheyi</i>      | Boiss.                    | KC212645 | <i>Esula</i> |
| <i>Euphorbia</i> | <i>stricta</i>        | L.                        | KC212649 | <i>Esula</i> |
| <i>Euphorbia</i> | <i>stygiana</i>       | H. C. Watson              | KC212651 | <i>Esula</i> |
| <i>Euphorbia</i> | <i>sulcata</i>        | Lens ex Loisel.           | KC212652 | <i>Esula</i> |
| <i>Euphorbia</i> | <i>sultan-hassei</i>  | A. Strid and al.          | KC212653 | <i>Esula</i> |
| <i>Euphorbia</i> | <i>szovitsii</i>      | Fisch and C. A. Mey.      | KC212655 | <i>Esula</i> |
| <i>Euphorbia</i> | <i>talastavica</i>    | (Porkh.) Porkh.           | KC212657 | <i>Esula</i> |
| <i>Euphorbia</i> | <i>teheranica</i>     | Boiss.                    | KC212658 | <i>Esula</i> |
| <i>Euphorbia</i> | <i>terraccina</i>     | L.                        | KC212660 | <i>Esula</i> |
| <i>Euphorbia</i> | <i>texana</i>         | Boiss.                    | KC212661 | <i>Esula</i> |
| <i>Euphorbia</i> | <i>translagana</i>    | Boiss.                    | KC212662 | <i>Esula</i> |
| <i>Euphorbia</i> | <i>triflora</i>       | Schott, Nyman and Kotschy | KC212663 | <i>Esula</i> |
| <i>Euphorbia</i> | <i>tshuiensis</i>     | (Porkh.) Serg. ex Krylov  | KC212664 | <i>Esula</i> |
| <i>Euphorbia</i> | <i>tuckeyana</i>      | Steud. ex Webb            | KC212667 | <i>Esula</i> |
| <i>Euphorbia</i> | <i>turczaninowii</i>  | Kar. and Kir.             | KC212668 | <i>Esula</i> |
| <i>Euphorbia</i> | <i>uliginosa</i>      | Welw. ex Boiss.           | KC212669 | <i>Esula</i> |
| <i>Euphorbia</i> | <i>usambarica</i>     | Pax                       | KC212670 | <i>Esula</i> |
| <i>Euphorbia</i> | <i>valerianifolia</i> | Lam.                      | KC212671 | <i>Esula</i> |
| <i>Euphorbia</i> | <i>valliniana</i>     | Belli                     | KC212672 | <i>Esula</i> |
| <i>Euphorbia</i> | <i>variabilis</i>     | Ces.                      | KC212673 | <i>Esula</i> |
| <i>Euphorbia</i> | <i>velenovskyi</i>    | Bornm.                    | KC212674 | <i>Esula</i> |
| <i>Euphorbia</i> | <i>veneris</i>        | M. S. Khan                | KC212675 | <i>Esula</i> |
| <i>Euphorbia</i> | <i>verrucosa</i>      | L.                        | KC212676 | <i>Esula</i> |
| <i>Euphorbia</i> | <i>virgata</i>        | Waldst. and Kit.          | KC212678 | <i>Esula</i> |

Supplementary Table 2 continued. GenBank accession numbers. Names and GenBank accession numbers of species sampled.

| Genus            | Species                   | Author         | GenBank  | Clade            |
|------------------|---------------------------|----------------|----------|------------------|
| <i>Euphorbia</i> | <i>walachii</i>           | Hook.f.        | KC212683 | <i>Esula</i>     |
| <i>Euphorbia</i> | <i>x popovii</i>          | Rotschild      | KC212608 | <i>Esula</i>     |
| <i>Euphorbia</i> | <i>abdelkuri</i>          | Balf.f.        | KC019836 | <i>Euphorbia</i> |
| <i>Euphorbia</i> | <i>abyssinica</i>         | J. F. Gmel.    | KC019793 | <i>Euphorbia</i> |
| <i>Euphorbia</i> | <i>aff. retrospina</i>    |                | KC019757 | <i>Euphorbia</i> |
| <i>Euphorbia</i> | <i>alfredii</i>           | Rauh           | KC019827 | <i>Euphorbia</i> |
| <i>Euphorbia</i> | <i>alluaudii</i>          | Drake          | KC019746 | <i>Euphorbia</i> |
| <i>Euphorbia</i> | <i>ammak</i>              | Schweinf.      | KC019820 | <i>Euphorbia</i> |
| <i>Euphorbia</i> | <i>antiqorum</i>          | L.             | KC019777 | <i>Euphorbia</i> |
| <i>Euphorbia</i> | <i>arbuscula</i>          | Balf. f.       | JN249105 | <i>Euphorbia</i> |
| <i>Euphorbia</i> | <i>avasmontana</i>        | Dinter         | KC019783 | <i>Euphorbia</i> |
| <i>Euphorbia</i> | <i>beharensis</i>         | Leandri        | KC019832 | <i>Euphorbia</i> |
| <i>Euphorbia</i> | <i>bisellenbeckii</i>     | Bruyns         | KC019810 | <i>Euphorbia</i> |
| <i>Euphorbia</i> | <i>boophthona</i>         | C. A. Gardner  | KC019775 | <i>Euphorbia</i> |
| <i>Euphorbia</i> | <i>bouheyi</i>            | L. C. Leach    | KC019814 | <i>Euphorbia</i> |
| <i>Euphorbia</i> | <i>bracteata</i>          | Jacq.          | KC019845 | <i>Euphorbia</i> |
| <i>Euphorbia</i> | <i>breviarticulata</i>    | Pax            | JQ750771 | <i>Euphorbia</i> |
| <i>Euphorbia</i> | <i>bussei</i>             | Pax            | KC019796 | <i>Euphorbia</i> |
| <i>Euphorbia</i> | <i>caducifolia</i>        | Haines         | KC019809 | <i>Euphorbia</i> |
| <i>Euphorbia</i> | <i>caerulscens</i>        | Haw.           | KC019782 | <i>Euphorbia</i> |
| <i>Euphorbia</i> | <i>calyculata</i>         | Kunth          | AF538221 | <i>Euphorbia</i> |
| <i>Euphorbia</i> | <i>capsaintemariensis</i> | (Rauh) Cremers | KC019760 | <i>Euphorbia</i> |
| <i>Euphorbia</i> | <i>cestrifolia</i>        | Kunth          | AF538213 | <i>Euphorbia</i> |
| <i>Euphorbia</i> | <i>clivicola</i>          | R. A. Dyer     | KC019855 | <i>Euphorbia</i> |
| <i>Euphorbia</i> | <i>comosa</i>             | Vell.          | JN249118 | <i>Euphorbia</i> |
| <i>Euphorbia</i> | <i>confinalis</i>         | R. A. Dyer     | KC019849 | <i>Euphorbia</i> |
| <i>Euphorbia</i> | <i>cooperi</i>            | N. E. Br.      | KC019858 | <i>Euphorbia</i> |
| <i>Euphorbia</i> | <i>croizatii</i>          | Leandri        | KC019761 | <i>Euphorbia</i> |

Supplementary Table 2 continued. GenBank accession numbers. Names and GenBank accession numbers of species sampled.

| Genus            | Species              | Author                         | GenBank  | Clade            |
|------------------|----------------------|--------------------------------|----------|------------------|
| <i>Euphorbia</i> | <i>cubensis</i>      | Boiss.                         | EF653259 | <i>Euphorbia</i> |
| <i>Euphorbia</i> | <i>curvirostrata</i> | R. A. Dyer                     | KC019791 | <i>Euphorbia</i> |
| <i>Euphorbia</i> | <i>cylindrofolia</i> | Marn.-Lap. and Rauh            | KC019834 | <i>Euphorbia</i> |
| <i>Euphorbia</i> | <i>damarana</i>      | L. C. Leach                    | KC019866 | <i>Euphorbia</i> |
| <i>Euphorbia</i> | <i>decaryi</i>       | Guillaumin                     | KC019831 | <i>Euphorbia</i> |
| <i>Euphorbia</i> | <i>decidua</i>       | P. R. O. Bally and L. C. Leach | KC019864 | <i>Euphorbia</i> |
| <i>Euphorbia</i> | <i>desmondii</i>     | Keay and Milne-Redh.           | KC019871 | <i>Euphorbia</i> |
| <i>Euphorbia</i> | <i>didieroides</i>   | Denis ex Leandri               | KC019877 | <i>Euphorbia</i> |
| <i>Euphorbia</i> | <i>drupifera</i>     | Thonn.                         | JN249131 | <i>Euphorbia</i> |
| <i>Euphorbia</i> | <i>elegantissima</i> | P. R. O. Bally and S. Carter   | KC019771 | <i>Euphorbia</i> |
| <i>Euphorbia</i> | <i>elodes</i>        | Boiss.                         | KC019779 | <i>Euphorbia</i> |
| <i>Euphorbia</i> | <i>enormis</i>       | N. E. Br.                      | KC019816 | <i>Euphorbia</i> |
| <i>Euphorbia</i> | <i>evansii</i>       | Pax                            | KC019788 | <i>Euphorbia</i> |
| <i>Euphorbia</i> | <i>famatamboay</i>   | F. Friedmann and Cremers       | KC019763 | <i>Euphorbia</i> |
| <i>Euphorbia</i> | <i>fanshawei</i>     | L. C. Leach                    | KC019865 | <i>Euphorbia</i> |
| <i>Euphorbia</i> | <i>fiherenensis</i>  | Poiss.                         | KC019749 | <i>Euphorbia</i> |
| <i>Euphorbia</i> | <i>fractiflexa</i>   | S. Carter and J. R. I. Wood    | KC019870 | <i>Euphorbia</i> |
| <i>Euphorbia</i> | <i>francoisii</i>    | Leandri                        | KC019841 | <i>Euphorbia</i> |
| <i>Euphorbia</i> | <i>fruticosa</i>     | Forsk.                         | KC019812 | <i>Euphorbia</i> |
| <i>Euphorbia</i> | <i>germainii</i>     | Phil.                          | AF538205 | <i>Euphorbia</i> |
| <i>Euphorbia</i> | <i>grandicornis</i>  | Goebel ex N. E. Br.            | KC019813 | <i>Euphorbia</i> |
| <i>Euphorbia</i> | <i>grandidens</i>    | Haw.                           | KC019785 | <i>Euphorbia</i> |
| <i>Euphorbia</i> | <i>griseola</i>      | Pax                            | KC019819 | <i>Euphorbia</i> |
| <i>Euphorbia</i> | <i>groenewaldii</i>  | R. A. Dyer                     | KC019854 | <i>Euphorbia</i> |
| <i>Euphorbia</i> | <i>guentheri</i>     | (Pax) Bruyns                   | KC019803 | <i>Euphorbia</i> |
| <i>Euphorbia</i> | <i>gymnonota</i>     | Urb.                           | JQ750808 | <i>Euphorbia</i> |
| <i>Euphorbia</i> | <i>haeleleana</i>    | Herbst                         | KC019876 | <i>Euphorbia</i> |

Supplementary Table 2 continued. GenBank accession numbers. Names and GenBank accession numbers of species sampled.

| Genus            | Species             | Author                          | GenBank  | Clade            |
|------------------|---------------------|---------------------------------|----------|------------------|
| <i>Euphorbia</i> | <i>hedyotoides</i>  | N. E. Br.                       | JN249157 | <i>Euphorbia</i> |
| <i>Euphorbia</i> | <i>helenae</i>      | Urb.                            | EF653261 | <i>Euphorbia</i> |
| <i>Euphorbia</i> | <i>heterochroma</i> | Pax                             | KC019797 | <i>Euphorbia</i> |
| <i>Euphorbia</i> | <i>heterodoxa</i>   | Mull. Arg.                      | KC019859 | <i>Euphorbia</i> |
| <i>Euphorbia</i> | <i>heteropoda</i>   | Pax                             | KC019807 | <i>Euphorbia</i> |
| <i>Euphorbia</i> | <i>heterospina</i>  | S. Carter                       | KC019847 | <i>Euphorbia</i> |
| <i>Euphorbia</i> | <i>hinkleyorum</i>  | I. M. Johnst.                   | JQ750814 | <i>Euphorbia</i> |
| <i>Euphorbia</i> | <i>hoffmanniana</i> | (Klotzsch and Garcke)<br>Boiss. | AF538211 | <i>Euphorbia</i> |
| <i>Euphorbia</i> | <i>horombensis</i>  | Ursch and Leandri               | KC019768 | <i>Euphorbia</i> |
| <i>Euphorbia</i> | <i>iharanae</i>     | Rauh                            | KC019840 | <i>Euphorbia</i> |
| <i>Euphorbia</i> | <i>ingens</i>       | E. Mey. ex Boiss.               | KC019857 | <i>Euphorbia</i> |
| <i>Euphorbia</i> | <i>intisy</i>       | Drake                           | KC019748 | <i>Euphorbia</i> |
| <i>Euphorbia</i> | <i>invenusta</i>    | (N. E. Br.) Bruyns              | KC019805 | <i>Euphorbia</i> |
| <i>Euphorbia</i> | <i>kamponii</i>     | Rauh and Petignat               | KC019755 | <i>Euphorbia</i> |
| <i>Euphorbia</i> | <i>keithii</i>      | R. A. Dyer                      | KC019786 | <i>Euphorbia</i> |
| <i>Euphorbia</i> | <i>lacei</i>        | Craib                           | KC019776 | <i>Euphorbia</i> |
| <i>Euphorbia</i> | <i>lactea</i>       | Haw.                            | KC019821 | <i>Euphorbia</i> |
| <i>Euphorbia</i> | <i>lactiflua</i>    | Phil.                           | AF538219 | <i>Euphorbia</i> |
| <i>Euphorbia</i> | <i>lagunillarum</i> | Croizat                         | KC019874 | <i>Euphorbia</i> |
| <i>Euphorbia</i> | <i>ledienii</i>     | A. Berger                       | KC019852 | <i>Euphorbia</i> |
| <i>Euphorbia</i> | <i>lenuptonii</i>   | S. Carter                       | KC019842 | <i>Euphorbia</i> |
| <i>Euphorbia</i> | <i>limpopoana</i>   | L. C. Leach ex S. Carter        | KC019851 | <i>Euphorbia</i> |
| <i>Euphorbia</i> | <i>lividiflora</i>  | L. C. Leach                     | KC019869 | <i>Euphorbia</i> |
| <i>Euphorbia</i> | <i>lomelii</i>      | V. W. Steinn.                   | JN249174 | <i>Euphorbia</i> |
| <i>Euphorbia</i> | <i>longispina</i>   | Chiov.                          | KC019862 | <i>Euphorbia</i> |
| <i>Euphorbia</i> | <i>lophogona</i>    | Lam.                            | KC019762 | <i>Euphorbia</i> |
| <i>Euphorbia</i> | <i>macracantha</i>  | Boiss.                          | KC019817 | <i>Euphorbia</i> |

Supplementary Table 2 continued. GenBank accession numbers. Names and GenBank accession numbers of species sampled.

| Genus            | Species                 | Author                                | GenBank  | Clade            |
|------------------|-------------------------|---------------------------------------|----------|------------------|
| <i>Euphorbia</i> | <i>milii</i>            | Des Moul.                             | JN249180 | <i>Euphorbia</i> |
| <i>Euphorbia</i> | <i>munizii</i>          | Borhidi                               | EF653262 | <i>Euphorbia</i> |
| <i>Euphorbia</i> | <i>neocarborescens</i>  | Bruyns                                | KC019839 | <i>Euphorbia</i> |
| <i>Euphorbia</i> | <i>neococcinea</i>      | Bruyns                                | KC019806 | <i>Euphorbia</i> |
| <i>Euphorbia</i> | <i>neohumbertii</i>     | Boiteau                               | KC019833 | <i>Euphorbia</i> |
| <i>Euphorbia</i> | <i>neoreflexa</i>       | Bruyns                                | KC019843 | <i>Euphorbia</i> |
| <i>Euphorbia</i> | <i>neorubella</i>       | Bruyns                                | KC019804 | <i>Euphorbia</i> |
| <i>Euphorbia</i> | <i>neospinescens</i>    | Bruyns                                | KC019811 | <i>Euphorbia</i> |
| <i>Euphorbia</i> | <i>neriifolia</i>       | L.                                    | KC019772 | <i>Euphorbia</i> |
| <i>Euphorbia</i> | <i>pachysantha</i>      | Baill.                                | JN249193 | <i>Euphorbia</i> |
| <i>Euphorbia</i> | <i>pedilanthoides</i>   | Denis                                 | KC019808 | <i>Euphorbia</i> |
| <i>Euphorbia</i> | <i>peperomioides</i>    | Boiss.                                | KC019780 | <i>Euphorbia</i> |
| <i>Euphorbia</i> | <i>persistentifolia</i> | L. C. Leach                           | KC019868 | <i>Euphorbia</i> |
| <i>Euphorbia</i> | <i>pervilleana</i>      | Baill.                                | JQ750835 | <i>Euphorbia</i> |
| <i>Euphorbia</i> | <i>phosphorea</i>       | Mart.                                 | JQ750836 | <i>Euphorbia</i> |
| <i>Euphorbia</i> | <i>plumerioides</i>     | Teijsm. ex Hassk.                     | KC019848 | <i>Euphorbia</i> |
| <i>Euphorbia</i> | <i>podocarpifolia</i>   | Urb.                                  | EF653263 | <i>Euphorbia</i> |
| <i>Euphorbia</i> | <i>portulacoides</i>    | L.                                    | JN249204 | <i>Euphorbia</i> |
|                  |                         | subsp. <i>collina</i> (Phil. Croizat) |          |                  |
| <i>Euphorbia</i> | <i>pseudoburuana</i>    | P. R. O. Bally and S. Carter          | KC019867 | <i>Euphorbia</i> |
| <i>Euphorbia</i> | <i>pseudocactus</i>     | A. Berger                             | KC019787 | <i>Euphorbia</i> |
| <i>Euphorbia</i> | <i>pseudomollis</i>     | Bruyns                                | KC019799 | <i>Euphorbia</i> |
| <i>Euphorbia</i> | <i>pseudotrineravis</i> | Bruyns                                | KC019844 | <i>Euphorbia</i> |
| <i>Euphorbia</i> | <i>pteroneura</i>       | A. Berger                             | KC019815 | <i>Euphorbia</i> |
| <i>Euphorbia</i> | <i>punicea</i>          | Sw.                                   | JN249208 | <i>Euphorbia</i> |
| <i>Euphorbia</i> | <i>ramipressa</i>       | Croizat                               | KC019824 | <i>Euphorbia</i> |
| <i>Euphorbia</i> | <i>randrianjohanyji</i> | Haevermans and Labat                  | KC019751 | <i>Euphorbia</i> |
| <i>Euphorbia</i> | <i>rauhii</i>           | Haevermans and Labat                  | KC019765 | <i>Euphorbia</i> |

Supplementary Table 2 continued. GenBank accession numbers. Names and GenBank accession numbers of species sampled.

| Genus            | Species              | Author                                            | GenBank  | Clade            |
|------------------|----------------------|---------------------------------------------------|----------|------------------|
| <i>Euphorbia</i> | <i>resinifera</i>    | O. Berg                                           | JN249214 | <i>Euphorbia</i> |
| <i>Euphorbia</i> | <i>rhizophora</i>    | (P. R. O. Bally) Bruyins                          | KC019802 | <i>Euphorbia</i> |
| <i>Euphorbia</i> | <i>robecchii</i>     | Pax                                               | KC019825 | <i>Euphorbia</i> |
| <i>Euphorbia</i> | <i>roscens</i>       | E. L. Bridges and Orzell                          | KC019774 | <i>Euphorbia</i> |
| <i>Euphorbia</i> | <i>rossii</i>        | Rauh and Buchloh                                  | KC019830 | <i>Euphorbia</i> |
| <i>Euphorbia</i> | <i>royleana</i>      | Boiss.                                            | JQ750845 | <i>Euphorbia</i> |
| <i>Euphorbia</i> | <i>rubella</i>       | Pax                                               | AF538204 | <i>Euphorbia</i> |
| <i>Euphorbia</i> | <i>sapinii</i>       | De Wild.                                          | KC019872 | <i>Euphorbia</i> |
| <i>Euphorbia</i> | <i>seibanica</i>     | Lavranos and Gifri                                | KC019863 | <i>Euphorbia</i> |
| <i>Euphorbia</i> | <i>sekukuniensis</i> | R. A. Dyer                                        | KC019784 | <i>Euphorbia</i> |
| <i>Euphorbia</i> | <i>sinclairiana</i>  | Benth.                                            | AF538217 | <i>Euphorbia</i> |
| <i>Euphorbia</i> | <i>sipolisi</i>      | N. E. Br.                                         | KC019778 | <i>Euphorbia</i> |
| <i>Euphorbia</i> | <i>stellata</i>      | Willd.                                            | KC019789 | <i>Euphorbia</i> |
| <i>Euphorbia</i> | <i>stenoclada</i>    | Baill.                                            | KC019750 | <i>Euphorbia</i> |
| <i>Euphorbia</i> | <i>sudanica</i>      | A. Chev.                                          | KC019818 | <i>Euphorbia</i> |
| <i>Euphorbia</i> | <i>tanaensis</i>     | P. R. O. Bally and S. Carter                      | KC019798 | <i>Euphorbia</i> |
| <i>Euphorbia</i> | <i>tanguahete</i>    | Sesse and Moc.                                    | AF538224 | <i>Euphorbia</i> |
| <i>Euphorbia</i> | <i>teke</i>          | Schweinf. ex Pax                                  | KC019835 | <i>Euphorbia</i> |
| <i>Euphorbia</i> | <i>tetragona</i>     | Haw.                                              | KC019781 | <i>Euphorbia</i> |
| <i>Euphorbia</i> | <i>thinophila</i>    | Phil.                                             | AF538218 | <i>Euphorbia</i> |
| <i>Euphorbia</i> | <i>tirucalli</i>     | L.                                                | KC019850 | <i>Euphorbia</i> |
| <i>Euphorbia</i> | <i>tithymaloides</i> | L.                                                | KC019745 | <i>Euphorbia</i> |
| <i>Euphorbia</i> | <i>umbellata</i>     | (Pax) Bruyins                                     | JN249237 | <i>Euphorbia</i> |
| <i>Euphorbia</i> | <i>umbelliformis</i> | (Urb. and Ekman) V. W.<br>Steinm. and P. E. Berry | EF653258 | <i>Euphorbia</i> |
| <i>Euphorbia</i> | <i>unispina</i>      | N. E. Br.                                         | JN249239 | <i>Euphorbia</i> |
| <i>Euphorbia</i> | <i>vajravelui</i>    | Binojk. and N. P. Balakr.                         | KC019770 | <i>Euphorbia</i> |
| <i>Euphorbia</i> | <i>venenifca</i>     | Tremaux ex Kotschy                                | JN249240 | <i>Euphorbia</i> |



Supplementary Table 2 continued. GenBank accession numbers. Names and GenBank accession numbers of species sampled.

| Genus                      | Species              | Author             | GenBank  | Clade            |
|----------------------------|----------------------|--------------------|----------|------------------|
| 543 <i>Euphorbia</i>       | <i>viguieri</i>      | Denis              | KC019828 | <i>Euphorbia</i> |
| 544 <i>Euphorbia</i>       | <i>weberbaueri</i>   | Mansf.             | AF538212 | <i>Euphorbia</i> |
| 545 <i>Euphorbia</i>       | <i>xylophyloides</i> | Brongn. ex Lem.    | KC019826 | <i>Euphorbia</i> |
| 546 <i>Calycopeplus</i>    | <i>casurinoides</i>  | L. S. Sm.          | JN249080 | <i>Outgroup</i>  |
| 547 <i>Gymnanthes</i>      | <i>cf. albicans</i>  | (Griseb.) Urb.     | JN249083 | <i>Outgroup</i>  |
| 548 <i>Microstachys</i>    | <i>chamaelea</i>     | (L.) Mull. Arg.    | JN249088 | <i>Outgroup</i>  |
| 549 <i>Neoguillauminia</i> | <i>cleopatra</i>     | (Baill.) Croizat   | JN249090 | <i>Outgroup</i>  |
| 550 <i>Hura</i>            | <i>crepitans</i>     | L.                 | JN249085 | <i>Outgroup</i>  |
| 551 <i>Senefelderopsis</i> | <i>croizatii</i>     | Steyerm.           | JN249091 | <i>Outgroup</i>  |
| 552 <i>Dichostemma</i>     | <i>glaucescens</i>   | Pierre             | JN249082 | <i>Outgroup</i>  |
| 553 <i>Maprounea</i>       | <i>guianensis</i>    | Aubl.              | JN249087 | <i>Outgroup</i>  |
| 554 <i>Colliguaja</i>      | <i>integerrima</i>   | Gillies and Hook.  | JN249081 | <i>Outgroup</i>  |
| 555 <i>Bonania</i>         | <i>microphylla</i>   | Urb.               | JN249079 | <i>Outgroup</i>  |
| 556 <i>Homalanthus</i>     | <i>nuttans</i>       | (G. Forst.) Guill. | JN249084 | <i>Outgroup</i>  |
| 557 <i>Anthostema</i>      | <i>senegalense</i>   | A. Juss.           | JN249078 | <i>Outgroup</i>  |
| 558 <i>Stillingia</i>      | <i>sylvatica</i>     | L.                 | JN249092 | <i>Outgroup</i>  |
| 559 <i>Mabea</i>           | <i>taquari</i>       | Aubl.              | JN249086 | <i>Outgroup</i>  |
| 560 <i>Nealchornea</i>     | <i>yapurenensis</i>  | Huber              | JN249089 | <i>Outgroup</i>  |

subsp. *tenuis* (Small) D. J.  
Rogers

**Supplementary Table 3. Re-classification of EBDCS vertebrate poisons.** Re-classification of Economic Botany Data Collection Standard (EBDCS) category *vertebrate poisons* into categories of *inflammatory response*.

|         | EBDCS subcategories |                                                  | <i>inflammatory response</i> |
|---------|---------------------|--------------------------------------------------|------------------------------|
| Mammals | humans (126)        | Abnormalities (1)                                | possible                     |
| Mammals | humans (126)        | Digestive System Disorders (12)                  | no                           |
| Mammals | humans (126)        | Digestive System Disorders (12)                  | no                           |
| Mammals | humans (126)        | Digestive System Disorders (12)                  | no                           |
| Mammals | humans (126)        | Digestive System Disorders (12)                  | no                           |
| Mammals | humans (126)        | Digestive System Disorders (12)                  | no                           |
| Mammals | humans (126)        | Digestive System Disorders (12)                  | no                           |
| Mammals | humans (126)        | Digestive System Disorders (12)                  | no                           |
| Mammals | humans (126)        | Digestive System Disorders (12)                  | no                           |
| Mammals | humans (126)        | Digestive System Disorders (12)                  | no                           |
| Mammals | humans (126)        | Genitourinary System Disorders (1)               | no                           |
| Mammals | humans (126)        | Inflammation (7)                                 | possible                     |
| Mammals | humans (126)        | Injuries (10)                                    | no                           |
| Mammals | humans (126)        | Injuries (10)                                    | possible                     |
| Mammals | humans (126)        | Mental Disorders (1)                             | no                           |
| Mammals | humans (126)        | Pain (1)                                         | possible                     |
| Mammals | humans (126)        | Pregnancy/Birth/Puerperium Disorders (2)         | no                           |
| Mammals | humans (126)        | Sensory System Disorders (11)                    | no                           |
| Mammals | humans (126)        | Sensory System Disorders (11)                    | no                           |
| Mammals | humans (126)        | Skin/Subcutaneous Cellular Tissue Disorders (20) | possible                     |
| Mammals | humans (126)        | Skin/Subcutaneous Cellular Tissue Disorders (20) | possible                     |
| Mammals | humans (126)        | Skin/Subcutaneous Cellular Tissue Disorders (20) | possible                     |
| Mammals | humans (126)        | Skin/Subcutaneous Cellular Tissue Disorders (20) | possible                     |
| Mammals | humans (126)        | Unspecified (60)                                 | unknown                      |

**Supplementary Table 4. Re-classification of EBDCS medicines.** Re-classification of Economic Botany Data Collection Standard (EBDCS) category medicines into categories of *inflammatory response*.

|                                     | EBDCS subcategories                | <i>inflammatory response</i>                                                                        |
|-------------------------------------|------------------------------------|-----------------------------------------------------------------------------------------------------|
| Abnormalities (37)                  | oedemas (35)                       | possible                                                                                            |
| Abnormalities (37)                  | lesions (1)                        | no                                                                                                  |
| Abnormalities (37)                  | fistula (1)                        | no                                                                                                  |
| Blood System Disorders (4)          | purify blood (2) + unspecified (2) | no + possible (spleen enlargement), no                                                              |
| Circulatory System Disorders (8)    | heart disease (5)                  | no                                                                                                  |
| Circulatory System Disorders (8)    | hypertension (3)                   | no                                                                                                  |
| Digestive System Disorders (143)    | purgative (53)                     | no                                                                                                  |
| Digestive System Disorders (143)    | emetic (19)                        | no                                                                                                  |
| Digestive System Disorders (143)    | laxative (8)                       | no                                                                                                  |
| Digestive System Disorders (143)    | diarrhoea (16)                     | no                                                                                                  |
| Digestive System Disorders (143)    | indigestion (5)                    | no                                                                                                  |
| Digestive System Disorders (143)    | constipation (7)                   | no                                                                                                  |
| Digestive System Disorders (143)    | colic (6)                          | no                                                                                                  |
| Digestive System Disorders (143)    | caries (7)                         | no                                                                                                  |
| Digestive System Disorders (143)    | bilioussness (1)                   | no                                                                                                  |
| Digestive System Disorders (143)    | bloat (1)                          | no                                                                                                  |
| Digestive System Disorders (143)    | choloretic (1)                     | no                                                                                                  |
| Digestive System Disorders (143)    | carminative (1)                    | no                                                                                                  |
| Digestive System Disorders (143)    | stercorrhagia (1)                  | no                                                                                                  |
| Digestive System Disorders (143)    | jaundice (7)                       | no                                                                                                  |
| Digestive System Disorders (143)    | unspecified (10)                   | unknown, no (liver disorder, tooth loosening, gargle), possible (dental use to treat affected gums) |
| Endocrine System Disorders (3)      | diabetes mellitus                  | no                                                                                                  |
| Genitourinary System Disorders (36) | bladder stones (1)                 | no                                                                                                  |
| Genitourinary System Disorders (36) | chyluria (1)                       | no                                                                                                  |
| Genitourinary System Disorders (36) | small breasts (1)                  | no                                                                                                  |

**Supplementary Table 4 continued. Re-classification of EBDCS medicines.** Re-classification of Economic Botany Data Collection Standard (EBDCS) category *medicines* into categories of *inflammatory response*.

|                                     | EBDCS subcategories                                                              | <i>inflammatory response</i>                |
|-------------------------------------|----------------------------------------------------------------------------------|---------------------------------------------|
| Genitourinary System Disorders (36) | aphrodisiac (1)                                                                  | no                                          |
| Genitourinary System Disorders (36) | diuretic (4)                                                                     | no                                          |
| Genitourinary System Disorders (36) | emmenagogue (1)                                                                  | no                                          |
| Genitourinary System Disorders (36) | blennorrhagia (2)                                                                | possible                                    |
| Genitourinary System Disorders (36) | dysuria (3)                                                                      | possible                                    |
| Genitourinary System Disorders (36) | female infertility (2)                                                           | no                                          |
| Genitourinary System Disorders (36) | male infertility (2)                                                             | no                                          |
| Genitourinary System Disorders (36) | haematuria (6)                                                                   | possible                                    |
| Genitourinary System Disorders (36) | impotence (1)                                                                    | no                                          |
| Genitourinary System Disorders (36) | leukorrhoea (2)                                                                  | no                                          |
| Genitourinary System Disorders (36) | oliguria (1)                                                                     | no                                          |
| Genitourinary System Disorders (36) | unspecified (8)                                                                  | unknown, no (ailments of the urinary tract) |
| Infections/Infestations (75)        | infections, arthropod infestations (5)                                           | possible                                    |
| Infections/Infestations (75)        | infections, fever (7)                                                            | possible                                    |
| Infections/Infestations (75)        | infections, microbial infections, bacterial infections (27)                      | possible                                    |
| Infections/Infestations (75)        | infections, microbial infections, fungal infections (4)                          | possible                                    |
| Infections/Infestations (75)        | infections, microbial infections, viral infections (8)                           | possible                                    |
| Infections/Infestations (75)        | infections, parasitic infections (19)                                            | possible                                    |
| Infections/Infestations (75)        | infections, unspecified (5)                                                      | possible                                    |
| Inflammation (47)                   | digestive system, intestine (22), gums (1), small intestine (1), unspecified (1) | possible                                    |
| Inflammation (47)                   | genitourinary system, breasts (2), kidneys (1)                                   | possible                                    |

**Supplementary Table 4 continued. Re-classification of EBDCS medicines.** Re-classification of Economic Botany Data Collection Standard (EBDCS) category *medicines* into categories of *inflammatory response*.

|                                         | EBDCS subcategories                                                       | <i>inflammatory response</i> |
|-----------------------------------------|---------------------------------------------------------------------------|------------------------------|
| Inflammation (47)                       | muscular-skeletal system, limbs (1), bones (1), soft tissues (2)          | possible                     |
| Inflammation (47)                       | respiratory system, bronchi (9), respiratory mucosae (1), unspecified (1) | possible                     |
| Inflammation (47)                       | sensory system, conjunctivae, (4)                                         | possible                     |
| Injuries (60)                           | abscesses (3)                                                             | possible                     |
| Injuries (60)                           | blisters (2)                                                              | possible                     |
| Injuries (60)                           | burns (1)                                                                 | possible                     |
| Injuries (60)                           | haemorrhages (26)                                                         | no                           |
| Injuries (60)                           | injuries (1)                                                              | no                           |
| Injuries (60)                           | wounds (26)                                                               | possible                     |
| Injuries (60)                           | unspecified (1)                                                           | possible                     |
| Mental Disorders (7)                    | hallucinogenic (1)                                                        | no                           |
| Mental Disorders (7)                    | narcotic (1)                                                              | no                           |
| Mental Disorders (7)                    | alcohol dependence (3)                                                    | no                           |
| Mental Disorders (7)                    | sleep disorders, hypnotic (1)                                             | no                           |
| Mental Disorders (7)                    | unspecified (1)                                                           | no                           |
| Metabolic System Disorders (10)         | gout (1)                                                                  | possible                     |
| Metabolic System Disorders (10)         | diaphoretic (9)                                                           | no                           |
| Muscular-Skeletal System Disorders (12) | rheumatism (7)                                                            | possible                     |
| Muscular-Skeletal System Disorders (12) | spasms (1)                                                                | no                           |
| Muscular-Skeletal System Disorders (12) | sprains (2)                                                               | possible                     |
| Muscular-Skeletal System Disorders (12) | asthenia (1)                                                              | possible                     |
| Muscular-Skeletal System Disorders (12) | lumbago (1)                                                               | possible                     |
| Neoplasms (15)                          | unspecified neoplasms (14)                                                | possible                     |
| Neoplasms (15)                          | malignant neoplasms (1)                                                   | possible                     |
| Nervous System Disorders (7)            | stimulant (4)                                                             | no                           |

**Supplementary Table 4 continued. Re-classification of EBDCS medicines.** Re-classification of Economic Botany Data Collection Standard (EBDCS) category *medicines* into categories of *inflammatory response*.

|                                           | EBDCS subcategories                                     | <i>inflammatory response</i> |
|-------------------------------------------|---------------------------------------------------------|------------------------------|
| Nervous System Disorders (7)              | paralysis (2)                                           | no                           |
| Nervous System Disorders (7)              | unspecified (1)                                         | unknown                      |
| Nutritional Disorders (10)                | malnutrition (1)                                        | no                           |
| Nutritional Disorders (10)                | tonic (8)                                               | no                           |
| Nutritional Disorders (10)                | vitamin D deficiency (1)                                | no                           |
| Pain (31)                                 | muscular-skeletal system, chest (3), head (3), body (1) | possible                     |
| Pain (31)                                 | digestive system, teeth (10), stomach (5)               | possible                     |
| Pain (31)                                 | nervous system, nerves (1)                              | no                           |
| Pain (31)                                 | respiratory system, pharynx (1)                         | possible                     |
| Pain (31)                                 | sensory system, ears (1)                                | possible                     |
| Pain (31)                                 | skin/subcutaneous cellular tissue disorders, skin (1)   | possible                     |
| Pain (31)                                 | unspecified (5)                                         | unknown                      |
| Poisonings (16)                           | bites and stings (12)                                   | no                           |
| Poisonings (16)                           | antihistaminic (1)                                      | possible                     |
| Poisonings (16)                           | medicine poisoning (1)                                  | unknown                      |
| Poisonings (16)                           | unspecified (2)                                         | no                           |
| Pregnancy/Birth/Puerperium Disorders (23) | lactation stimulant (15)                                | no                           |
| Pregnancy/Birth/Puerperium Disorders (23) | labour induction (1)                                    | no                           |
| Pregnancy/Birth/Puerperium Disorders (23) | postpartum depurant (1)                                 | no                           |
| Pregnancy/Birth/Puerperium Disorders (23) | unspecified (6)                                         | unknown                      |
| Respiratory System Disorders (40)         | bronchial affections (3)                                | possible                     |
| Respiratory System Disorders (40)         | asthma (22)                                             | possible                     |
| Respiratory System Disorders (40)         | expectorant (1)                                         | no                           |
| Respiratory System Disorders (40)         | breathlessness (1)                                      | possible                     |

**Supplementary Table 4 continued. Re-classification of EBDCS medicines.** Re-classification of Economic Botany Data Collection Standard (EBDCS) category *medicines* into categories of *inflammatory response*.

| EBDCS subcategories                              |                              | <i>inflammatory response</i> |
|--------------------------------------------------|------------------------------|------------------------------|
| Respiratory System Disorders (40)                | pneumonia (1)                | possible                     |
| Respiratory System Disorders (40)                | coughs (10)                  | possible                     |
| Respiratory System Disorders (40)                | unspecified (2)              | no (errhine), unknown        |
| Sensory System Disorders (21)                    | ear troubles (1)             | no                           |
| Sensory System Disorders (21)                    | remove pus inside ear (1)    | no                           |
| Sensory System Disorders (21)                    | deafness (1)                 | no                           |
| Sensory System Disorders (21)                    | eye disorders (14)           | no                           |
| Sensory System Disorders (21)                    | remove corneal opacities (1) | possible                     |
| Sensory System Disorders (21)                    | blindness (1)                | no                           |
| Sensory System Disorders (21)                    | cataracts (2)                | possible                     |
| Skin/Subcutaneous Cellular Tissue Disorders (99) | emollient (1)                | no                           |
| Skin/Subcutaneous Cellular Tissue Disorders (99) | disinfectant (1)             | no                           |
| Skin/Subcutaneous Cellular Tissue Disorders (99) | astringent (6)               | no                           |
| Skin/Subcutaneous Cellular Tissue Disorders (99) | antiseptic (1)               | no                           |
| Skin/Subcutaneous Cellular Tissue Disorders (99) | whitlows (1)                 | possible                     |
| Skin/Subcutaneous Cellular Tissue Disorders (99) | warts (18)                   | possible                     |
| Skin/Subcutaneous Cellular Tissue Disorders (99) | ulcers (3)                   | possible                     |
| Skin/Subcutaneous Cellular Tissue Disorders (99) | sunburn (1)                  | possible                     |
| Skin/Subcutaneous Cellular Tissue Disorders (99) | sores (13)                   | possible                     |
| Skin/Subcutaneous Cellular Tissue Disorders (99) | rashes (4)                   | possible                     |
| Skin/Subcutaneous Cellular Tissue Disorders (99) | pustules (1)                 | possible                     |
| Skin/Subcutaneous Cellular Tissue Disorders (99) | psoriasis (1)                | possible                     |
| Skin/Subcutaneous Cellular Tissue Disorders (99) | itching (5)                  | possible                     |
| Skin/Subcutaneous Cellular Tissue Disorders (99) | irritation (1)               | possible                     |
| Skin/Subcutaneous Cellular Tissue Disorders (99) | hair loss (1)                | possible                     |
| Skin/Subcutaneous Cellular Tissue Disorders (99) | eczema (6)                   | possible                     |
| Skin/Subcutaneous Cellular Tissue Disorders (99) | dermatitis (2)               | possible                     |

**Supplementary Table 4 continued. Re-classification of EBDCS medicines.** Re-classification of Economic Botany Data Collection Standard (EBDCS) category *medicines* into categories of *inflammatory response*.

| EBDCS subcategories                              |                   | <i>inflammatory response</i> |
|--------------------------------------------------|-------------------|------------------------------|
| Skin/Subcutaneous Cellular Tissue Disorders (99) | carbuncles (6)    | no                           |
| Skin/Subcutaneous Cellular Tissue Disorders (99) | calluses (1)      | no                           |
| Skin/Subcutaneous Cellular Tissue Disorders (99) | boils (2)         | no                           |
| Skin/Subcutaneous Cellular Tissue Disorders (99) | acne (2)          | no                           |
| Skin/Subcutaneous Cellular Tissue Disorders (99) | rubefacient (1)   | possible                     |
| Skin/Subcutaneous Cellular Tissue Disorders (99) | remove thorns (1) | no                           |
| Skin/Subcutaneous Cellular Tissue Disorders (99) | moles (1)         | possible                     |
| Skin/Subcutaneous Cellular Tissue Disorders (99) | freckles (1)      | possible                     |
| Skin/Subcutaneous Cellular Tissue Disorders (99) | unspecified (18)  | unknown                      |
| Unspecified Medicinal Disorders (78)             |                   | unknown                      |



## References

1. Katoh, K. & Standley, D. M. MAFFT multiple sequence alignment software version 7: improvements in performance and usability. *Mol. Biol. Evol.* **30**, 772-780 (2013).
2. Maddison, W. P. & Maddison, D. R. Mesquite: a modular system for evolutionary analysis. Version 3.01. <http://mesquiteproject.org> (2014).
3. Guindon, S. & Gascuel, O. A simple, fast and accurate method to estimate large phylogenies by maximum-likelihood. *Systematic Biology* **52**, 696-704 (2003).
4. Darriba, D., Taboada, G. L., Doallo, R. & Posada, D. jModelTest 2: more models, new heuristics and parallel computing. *Nat. Meth.* **9**, 772 (2012).
5. Akaike, H. 1974. A new look at the statistical model identification. *IEEE T. Automat. Contr.* **19**, 716-723 (1974).
6. Yang, Z. & Rannala, B. Bayesian phylogenetic inference using DNA sequences a Markov Chain Monte Carlo method. *Mol. Biol. Evol.* **14**, 717-724 (1997).
7. Ronquist, F. et al. MrBayes 3.2: Efficient Bayesian Phylogenetic Inference and Model Choice Across a Large Model Space. *Syst. Biol.* **61**, 539-542 (2012).
8. Rambaut, A., Suchard, M. A., Xie, D. & Drummond, A. J. Tracer v1.6. Available from <http://beast.bio.ed.ac.uk/Tracer> (2014).
9. Ernst, M. et al. Global medicinal uses of *Euphorbia* L. (Euphorbiaceae). *J. Ethnopharmacol.* **176**, 90-101 (2015).
10. Fritz, S. A. & Purvis, A. Selectivity in mammalian extinction risk and threat types: A new measure of phylogenetic signal strength in binary traits. *Conserv. Biol.* **24**, 1042-1051 (2010).
11. Paradis, E., Claude, J. & Strimmer, K. APE: analyses of phylogenetics and evolution in R language. *Bioinformatics* **20**, 289-290 (2004).
12. Luke, H. J., Weir, J. T., Brock, C. D., Glor, R. E., Challenger, W. GEIGER: investigating evolutionary radiations. *Bioinformatics* **24**, 129-131 (2008).
13. Wickham, H. The Split-Apply-Combine strategy for data analysis. *J. Stat. Softw.* **1**, 1-29 (2011).
14. Yang, Y. et al. Molecular phylogenetics and classification of *Euphorbia* subgenus *Chamaesyce* (Euphorbiaceae). *TAXON* **61**, 764-789 (2012).
15. Dorsey, B. L. et al. Phylogenetics, morphological evolution, and classification of *Euphorbia* subgenus *Euphorbia* (Euphorbiaceae). *TAXON* **62**, 291-315 (2013).
16. Peirson, J. A., Bruyns, P. V., Riina, R., Morawetz, J. J. & Berry, P. E. A molecular phylogeny and classification of the largely succulent and mainly African *Euphorbia* subg. *Athymalus* (Euphorbiaceae). *TAXON* **62**, 1178-1199 (2013).
17. Riina, R. et al. A worldwide molecular phylogeny and classification of the leafy spurges, *Euphorbia* subgenus *Esula* (Euphorbiaceae). *TAXON* **62**, 316-342 (2013).
